# Supplementary material for: The National COVID Cohort Collaborative (N3C): Rationale, design, infrastructure, and deployment
Source: Oxford University Press journal article supplement (doi:10.1093/jamia/ocaa196), 2020-08-14
Supplement: ocaa196_supplementary_data.zip [file ocaa196_supplementary_data.zip]

Archive with 6 entries (6 files):
- N3C Methods Authors Appendix.tsv
- N3C-Attribution and Publication Policy-v1-FINAL.docx
- n3c-collaborators-2020-06-23.csv
- N3C-Community Guiding Principles.docx
- n3c-mastheadAuthors-2020-06-23.csv
- NCATS_Data_Transfer_Agreement_05-11-2020_Updated 508.pdf
