# Supplementary material for: The National COVID Cohort Collaborative (N3C): Rationale, design, infrastructure, and deployment
Source: Oxford University Press journal article supplement (doi:10.1093/jamia/ocaa196), 2020-08-14
Supplement: ocaa196_supplementary_data.zip [file ocaa196_supplementary_data.zip › N3C Methods Authors Appendix.tsv]

Auth Number	FirstName	Middle	Surname	ORCID	Affil1	Affil2	Affil3	All affil numbers	contribution	Contributions
Author.001	Melissa	A.	Haendel	https://orcid.org/0000-0001-9114-8737	Oregon Clinical and Translational Research Institute, Oregon Health & Science University, Portland, OR, USA	Translational and Integrative Sciences Center, Dept. of Molecular Toxicology, Oregon State University, Corvallis, OR, USA		1,2	I have led the creation and implementation of N3C, coordinating all workstreams, resource development and integration, and generally playing data and people yenta.	1,4,7,8,10,13,14,52,78,101
Author.002	Christopher	G.	Chute	https://orcid.org/0000-0001-5437-2545	Schools of Medicine, Public Health, and Nursing, Johns Hopkins University, Baltimore, MD, USA			3	Program initation, governance, guidance, technical strategy, and promotion.	1,4,8,10,13,14,52,78,100,101
Author.003	Tellen	D.	Bennett	https://orcid.org/0000-0003-1483-4236	Section of Informatics and Data Science, Department of Pediatrics, University of Colorado School of Medicine, University of Colorado, Aurora, CO, USA			4	I contributed by participating in decision-making as co-lead of the Clinical Scenarios and Analytics subgroup and by offering language for and editing the manuscript.	9,10,13,14,52,100,101
Author.004	David	A.	Eichmann	https://orcid.org/00000-0003-3150-8758	School of Library and Information Science, The University of Iowa, Iowa City, IA, USA			5	I co-lead the Portal & Dashboards subgroup and am a member of the CD2H steering committee, and hence have been involved in decision making from the outset, as well as managing the N3C web site and COVID-19 publication search engine.	4,9,10,13,78,101
Author.005	Justin		Guinney	https://orcid.org/0000-0003-1477-1888	Sage Bionetworks, Seattle, WA, USA			6	I have led the Collaborative Analytics workstream.	4,9,10,14,78,101
Author.006	Warren	A.	Kibbe	https://orcid.org/0000-0001-5622-7659	Duke University, Durham, NC, USA			7	Contributing to the policy and governance components and the N3C data enclave portal and dashboards.	9,10,52,78,101
Author.007	Philip	R.O.	Payne	https://orcid.org/0000-0002-9532-2998	Institute for Informatics, Washington University in St. Louis, Saint Louis, MO, USA			8	Conceptualization of synthetic data work stream and architecture, development of content for manuscript,	4,9,10,78,101
Author.008	Emily	R.	Pfaff	https://orcid.org/0000-0002-6840-9756	North Carolina Translational and Clinical Sciences Institute (NC TraCS), University of North Carolina at Chapel Hill, Chapel Hill, NC, USA			9	I lead the Phenotype and Data Acquisition Workstream, and designed the data acquisition process in collaboration with a group of coders from across the CTSA consortium.	9,10,13,15,52,78
Author.009	Peter	N.	Robinson	https://orcid.org/0000-0002-0736-9199	Jackson Laboratory, Bar Harbor, ME, USA			10	I have led the Clinical Scenarios group and have contributed to the development of OMOP-HPO interoperability.	4,9,10,15,52,78,100
Author.010	Joel	H.	Saltz	https://orcid.org/0000-0002-3451-2165	Department of Biomedical Informatics, Stony Brook University, Stony Brook, NY, USA			11	Writing, contributed to decision making, contributed to system use case development and definition of covid 19 data elements	10,13,14,15,52,78,101
Author.011	Heidi		Spratt	https://orcid.org/0000-0002-9420-5028	University of Texas Medical Branch, Galveston, TX, USA			12	N3C Clinical Scenarios & Data Analytics subgroup co-lead	9,10,100
Author.012	Christine		Suver	https://orcid.org/0000-0002-2986-385X	Sage Bionetworks, Seattle, WA, USA			6	governance WG lead - developed governance policies and documents	10,78,101
Author.013	John		Wilbanks	https://orcid.org/0000-0002-4510-0385	Sage Bionetworks, Seattle, WA, USA			6	I have co-led the governance workstream.	10,78,101
Author.014	Adam	B.	Wilcox	https://orcid.org/0000-0002-6305-735X	University of Washington, Seattle, WA, USA			13	Advisory role (overall goal and strategy); author role (writing review and editing); data role (data modeling, data transformation, data validation); conceptualization role (contributed the original data use principles, the data modeling approach for specific use cases, and the centralized data approach)	10,101
Author.015	Andrew	E.	Williams	https://orcid.org/0000-0002-0692-412X	Tufts Medical Center Clinical and Translational Science Institute, Tufts Medical Center, Boston, MA, USA			14	My contribution fits the writing review and editing role in the contribution role ontology	10,13,78
Author.016	Chunlei		Wu	https://orcid.org/0000-0002-2629-6124	Department of Integrative Structural and Computational Biology, The Scripps Research Institute, La Jolla, CA, USA			15	I have co-led the Tools subgroup on collaborative analytics.	9,13,14,78
Author.017	Clair		Blacketer	https://orcid.org/0000-0003-2570-2124	Janssen Research and Development, LLC, Raritan, NJ, USA			16	I have served the N3C consortium as an OMOP subject matter expert providing guidance around the transformation of PCORNet, I2B2, and TriNetX to the OMOP model as well as offering data quality insights and solutions to be employed in the data pipeline.	15,52
Author.018	Robert	L.	Bradford	https://orcid.org/0000-0003-0908-1428	North Carolina Translational and Clinical Sciences Institute (NC TraCS), University of North Carolina at Chapel Hill, Chapel Hill, NC, USA			9	contributions to phenotype development from scientific and technical standpoint. Design and testing of phenotype and extraction scripts	9,52
Author.019	James	J.	Cimino	https://orcid.org/0000-0003-4101-1622	University of Alabama-Birmingham, Birmingham, AL, USA			17	Dr. Cimino served as a project advisor, and reviewed and provided comments on the manuscript.	10,14,101
Author.020	Marshall		Clark		North Carolina Translational and Clinical Sciences Institute (NC TraCS), University of North Carolina at Chapel Hill, Chapel Hill, NC, USA			9	Working on the phenotype and data acquisition stream, I developed the SQL code for the phenotype to run against PCORNet CDM, developed a python extraction script to help sites automate this process and contributed to the stream through daily meetings.	9,15,52
Author.021	Evan	W.	Colmenares	https://orcid.org/0000-0002-4993-2269	Department of Pharmaceutical Outcomes and Policy, University of North Carolina at Chapel Hill, Chapel Hill, NC, USA			18	I contributed to the design and code of the phenotype as well as the scripts to extract data from the common data models.	9,15,52
Author.022	Patricia	A.	Francis	https://orcid.org/0000-0001-9612-5702	Johns Hopkins University School of Medicine, Baltimore, MD, USA			19	Project management, regulatory, team management, project administration	78
Author.023	Davera		Gabriel	https://orcid.org/0000-0001-9041-4597	Johns Hopkins University School of Medicine, Baltimore, MD, USA			19	I provide content expertise and project management for the data ingestion and harmonization workstream	9,10,13,14,15,52
Author.024	Alexis		Graves	https://orcid.org/0000-0002-2193-9987	University of Iowa Institute for Clinical and Translational Science, The University of Iowa, Iowa City, IA, USA			20	I’ve contributed code and design work for web and visualization development, helped to support communication with design work, and supported project administration on a local institutional level.	7,9,78
Author.025	Raju		Hemadri		National Center for Advancing Translational Science, Bethesda, MD, USA			21	Design and architect DI&H system	9,15,52
Author.026	Stephanie	S.	Hong		Johns Hopkins University School of Medicine, Baltimore, MD, USA			19	I have designed and implemented the data ingestion and harmonization workflow both in SQL and as well as in Adeptia tool.	9,15,52
Author.027	George		Hripscak	https://orcid.org/0000-0003-2664-7614	Department of Biomedical Informatics, Columbia University, New York, NY, USA			22	I have helped with phenotyping and data harmonization related to OMOP.	10,52
Author.028	Dazhi		Jiao	https://orcid.org/0000-0001-5052-3836	Johns Hopkins University School of Medicine, Baltimore, MD, USA			19	Contributed code to the data harmonization process	9,15,52
Author.029	Jeffrey	G.	Klann		Harvard Medical School, Boston, MA, USA			23	Edited & provided comments on manuscript; participate in governance and data harmonization discussions; offer expertise on i2b2/ACT data model	14,52,101
Author.030	Kristin		Kostka	https://orcid.org/0000-0003-2595-8736	IQVIA, Durham, NC, USA			24	OMOP SME / Coder for Phenotype & Data Acquisition + Data Harmonization & Ingestion WGs	9,15,52
Author.031	Adam	M.	Lee		University of North Carolina at Chapel Hill, Chapel Hill, NC, USA			25	Contribution to phenotype and data intake development, processing, and PCORNet SME.	9,15,52
Author.032	Harold	P.	Lehmann	https://orcid.org/0000-0002-7698-219X	Johns Hopkins University School of Medicine, Baltimore, MD, USA			19	I participate in daily DI&H meetings, have site data collection and curation responsibility for JHU, and have reviewed the MS.	9,15,52
Author.033	Lora		Lingrey		TriNetX, Cambridge, MA, USA			26	Developed TriNetX phenotype and extract logic.	9,15,52
Author.034	Robert	T.	Miller	https://orcid.org/0000-0002-1787-2855	Tufts Clinical and Translational Science Institute, Tufts University, Boston, MA, USA			27	Contributed code and data	9,15,52
Author.035	Michele		Morris	https://orcid.org/0000-0002-3255-5727	Department of Biomedical Informatics, University of Pittsburgh, Pittsburgh, PA, USA			28	Phenotype small work group code and ACT to OMOP harmonization SME	9,15,52
Author.036	Shawn	N.	Murphy	https://orcid.org/0000-0002-1905-8806	Mass General Brigham, Boston, MA, USA			29	I have helped with phenotyping and data harmonization related to ACT.	9,15,52
Author.037	Karthik		Natarajan	https://orcid.org/0000-0002-9066-9431	Irving Medical Center, Columbia University, New York, NY, USA			30	I have helped with phenotyping, analytics and code. I've also provided general input on OMOP.	9,15,52
Author.038	Matvey	B.	Palchuk	https://orcid.org/0000-0002-7737-8752	TriNetX, Cambridge, MA, USA			26	representative of TriNetX - responsible for N3C submissions; active member of Phenotype and Data Acquisition working group	9,15,52
Author.039	Usman		Sheikh	https://orcid.org/0000-0002-1434-0888	National Center for Advancing Translational Science, Bethesda, MD, USA			21	My contribution has been to manage the NCATS infrastructure implementation and coordinate all of the vendors.	9,78
Author.040	Harold		Solbrig	https://orcid.org/0000-0002-5928-3071	Johns Hopkins University School of Medicine, Baltimore, MD, USA			19	Advisory and data transformation	9,15,52
Author.041	Shyam		Visweswaran	https://orcid.org/0000-0002-2079-8684	Department of Biomedical Informatics, University of Pittsburgh, Pittsburgh, PA, USA			28	Participating in decision-making in the Phenotype and Data Acquisition workstream.	10,15,52,101
Author.042	Anita		Walden	https://orcid.org/0000-0002-3327-7423	Oregon Clinical and Translational Research Institute, Oregon Health & Science University, Portland, OR, USA	Sage Bionetworks, Seattle, WA, USA		1,6	I have read contributed and edit the manuscript. My role in N3C as Assistant Director is operationalizing the infrastructure for the N3C, project management planning around the governance activities, organizing groups and helping to design and implement user-centered design principles for website and portals.	7,10,13,14,52,101
Author.043	Kellie	M.	Walters	https://orcid.org/0000-0002-7473-1709	North Carolina Translational and Clinical Sciences Institute (NC TraCS), University of North Carolina at Chapel Hill, Chapel Hill, NC, USA			9	Active member of Governance and Phenotype workstreams; revised manuscript text for those sections; reviewed and revised governance documentations; contributed to governance planning discussions; drafted data acquisition documentation; project management for data acquisition team.	10,14,101
Author.044	Griffin	M.	Weber	https://orcid.org/0000-0002-2597-881X	Department of Biomedical Informatics, Harvard Medical School, Boston, MA, USA			31	Participated in decision-making in the data quality group and patient hashing meetings.	10,101
Author.045	Xiaohan	Tanner	Zhang	https://orcid.org/0000-0002-4843-9077	Johns Hopkins University School of Medicine, Baltimore, MD, USA			19	I am an active member responsible for design and implementation in data ingestion and harmonization workstream.	9,15,52
Author.046	Richard	L.	Zhu	https://orcid.org/0000-0002-4289-7632	Johns Hopkins University School of Medicine, Baltimore, MD, USA			19	Data Ingestion & Harmonization Workstream	9,15,52
Author.047	Benjamin		Amor		Palantir Technologies, Palo Alto, CA, USA			32	Engineering and workflow lead for the Foundry software backing the N3C platform	78
Author.048	Andrew	T.	Girvin	https://orcid.org/0000-0002-2031-9209	Palantir Technologies, Palo Alto, CA, USA			32	I worked on the design and implementation of the Palantir platform for the N3C consortium, along with the first set of analyses done within it.	15,78
Author.049	Amin		Manna	https://orcid.org/0000-0002-4711-2128	Palantir Technologies, Palo Alto, CA, USA			32	I led the technical design and implementation of the Palantir Analytic platform for the N3C consortium	78
Author.050	Nabeel		Qureshi	https://orcid.org/0000-0002-3177-5314	Palantir Technologies, Palo Alto, CA, USA			32	I led the design and implementation of the Palantir Analytic platform for the N3C consortium, along with the first set of analyses done within it.	15,78
Author.051	Michael	G.	Kurilla		Division of Clinical Innovation, National Center for Advancing Translational Science, Bethesda, MD, USA			33	I have led the coordination of NIH programs	10,78
Author.052	Sam	G.	Michael		National Center for Advancing Translational Sciences, National Institutes of Health, Bethesda, MD, USA			34	As the CIO of NCATS i help support the entire N3C initiative from a design, implementation, operation and standpoint.	10,78
Author.053	Lili	M.	Portilla		Office of Strategic Alliances, National Center for Advancing Translational Sciences, National Institutes of Health, Bethesda, MD, USA			35	I drafted the Data Transfer Agreements and Data Use Agreements for N3C	101
Author.054	Joni	L.	Rutter	https://orcid.org/0000-0002-6502-2361	Office of the Director, National Center for Advancing Translational Science, Bethesda, MD, USA			36	I have led the regulatory implementation at NIH and provided programmatic vision and oversight.	1,101
Author.055	Christopher	P.	Austin	https://orcid.org/0000-0001-7770-0708	National Center for Advancing Translational Sciences, National Institutes of Health, Bethesda, MD, USA			34	Participated in decision making, scoping, and design of the project	101
Author.056	Ken	R.	Gersing	https://orcid.org/0000-0003-3897-3409	National Center for Advancing Translational Science, Bethesda, MD, USA			21	I have led the implementation of the architecture at NCATS as well as co-led the entire N3C effort across all workstreams.	78
Collab.057	Shaymaa		Al-Shukri	https://orcid.org/0000-0001-8587-9189	University of Arkansas for Medical Sciences, Little Rock, AR, USA			37	attending multiple workstream meetings and webinars, contributing data	4,15
Collab.058	Adil		Alaoui		Georgetown University, Washington, DC, USA			38	Contributed to data governance principles and N3C data access	101
Collab.059	Ahmad		Baghal	https://orcid.org/0000-0003-0389-0021	University of Arkansas for Medical Sciences, Little Rock, AR, USA			37	Contributing data from institutional EDW.	15
Collab.060	Pamela	D.	Banning		3M Health Information Systems, St. Paul, MN, USA			39	Focused on the laboratory data specific comments and plans for analysis; including surveillance for impending inflammatory tipping point leading to cytokine storm syndrome/hemodynamics instability and other ways in which laboratory values can help COVID-19 patient management.	15,100
Collab.061	Edward	M.	Barbour	https://orcid.org/0000-0002-2962-607X	University of Illinois at Chicago, Chicago, IL, USA			40	Contributor of data to the N3C consortium	8,15
Collab.062	Michael	J.	Becich	https://orcid.org/0000-0001-5998-8074	Department of Biomedical Informatics, University of Pittsburgh School of Medicine, Pittsburgh, PA, USA			41	I lead (as chair) the iEC lead team and connect CTSA hubs to CD2H and N3C. I am a collaborator in all five N3C workstream actively exchanging ideas and expertise. A team I lead is also contributing the ACT COVID phenotype and data pipelines for other N3C sites.	15,52,101
Collab.063	Afshin		Beheshti	https://orcid.org/0000-0003-4643-531X	KBR, Space Biosciences Division, NASA Ames Research Center, Moffett Field, CA, USA			42	Provided edits to the manuscript.	14
Collab.064	Gordon	R.	Bernard		Vanderbilt University Medical Center, Nashville, TN, USA			43	Significant data contribution.	8,15
Collab.065	Sharmodeep		Bhattacharyya	https://orcid.org/0000-0001-5011-4119	Oregon State University, Corvallis, OR, USA			44	Contributions in developing clinical scenarios	100
Collab.066	Mark	M.	Bissell		Palantir Technologies, Palo Alto, CA, USA			32	I contributed to the development of the data ingestion and harmonization pipeline (data integration role).	9,15
Collab.067	L. Ebony		Boulware		Duke University, Durham, NC, USA			7	Document review, contribution to ideas on use cases	14,100
Collab.068	Samuel		Bozzette		National Center for Advancing Translational Sciences, National Institutes of Health, Bethesda, MD, USA			34	Participated in governance and clinical groups	100,101
Collab.069	Donald	E.	Brown	https://orcid.org/0000-0002-9140-2632	School of Data Science, University of Virginia, Charlottesville, VA, USA			45	Provided a series of inputs to the draft DUA that were both wording suggestions and areas requiring further delineation and also provided input on how synthetic data should be considered in the DUA.	101
Collab.070	John	B.	Buse	https://orcid.org/0000-0002-9723-3876	University of North Carolina School of Medicine, Chapel Hill, NC, USA			46	Reviewed and edited content of the manuscript, provided advice and assistance in setting up the collaborative and work teams	14
Collab.071	Brian	J.	Bush		Virginia Commonwealth University, Richmond, VA, USA			47	Contributed data and revised governance documents	8,101
Collab.072	Tiffany	J.	Callahan	https://orcid.org/0000-0002-8169-9049	Computational Bioscience, University of Colorado Anschutz Medical Campus, Boulder, CO, USA			48	Provide detailed editing of manuscript, converted figures into tables, and helped with generation/formatting/maintenance of all citations via PaperPile	14,52
Collab.073	Thomas	R.	Campion		Weill Cornell Medicine, Cornell University, New York, NY, USA			49	Contributing data from New York City	8,15
Collab.074	Elena		Casiraghi	https://orcid.org/00000-0003-2024-7572	Computer Science Department, Università degli Studi di Milano, Milano, MI, Italy			50	code contribution, statistical analysis of patient data, deep learning for text context classification, deep learning for image classification, radiomics	9,15
Collab.075	Ammar	A.	Chaudhry	https://orcid.org/0000-0002-2126-0587	City of Hope National Medical Center, Duarte, CA, USA			51	contributed to the review of the manuscript and contributed to the discussion section of the manuscript,	13,14
Collab.076	Guanhua		Chen		University of Wisconsin-Madison, Madison, WI, USA			52	participating in Collaborative Analytics	9
Collab.077	Anjun		Chen	https://orcid.org/0000-0003-1528-1928	Web2express.org			53	In addition to participating in workstream calls and discussions, I added a "patient matching" use case under the enabled analyses section in the paper, for which I am working on connecting N3C analysis results to free real-time clinical collaboration tools for rapid and wide dissemination.	13
Collab.078	Gari	D.	Clifford	https://orcid.org/0000-0002-5709-201X	Emory University and Georgia Institute of Technology, Atlanta, GA, USA			54	contributing data	8,15
Collab.079	Megan	P.	Coffee	https://orcid.org/0000-0002-4581-111X	Grossman School of Medicine, New York University, New York, NY, USA			55	I edited and added additions related to the clinical applications of this consortium.	14,100
Collab.080	Tom		Conlin	https://orcid.org/0000-0003-0355-5581	Translational and Integrative Sciences Center, Dept. of Molecular Toxicology, Oregon State University, Corvallis, OR, USA			2	port schema to opersource database; minor edits	14
Collab.081	Connor		Cook	https://orcid.org/0000-0002-9313-0431	Oregon Clinical and Translational Research Institute, Oregon Health & Science University, Portland, OR, USA			1	Program Manager for CD2H, providing key operational support for the N3C initiative.	7,78
Collab.082	Keith	A.	Crandall	https://orcid.org/0000-0002-0836-3389	Computational Biology Institute and Department of Biostatistics & Bioinformatics, Milken Institute School of Public Health, The George Washington University, Washington, DC, USA			56	Contributions include participation in both the Phenotypes & Data Acquisition and Collaborative Analytics workflows, local data governance processing and data contribution, and manuscript review and editing.	9,14,101
Collab.083	Mariam		Deacy	https://orcid.org/0000-0001-8307-5208	National Center for Advancing Translational Sciences, National Institutes of Health, Bethesda, MD, USA			34	Project Management	78
Collab.084	Racquel	R.	Dietz		Oregon Clinical and Translational Research Institute, Oregon Health & Science University, Portland, OR, USA			1	I am the key scheduler for all official N3C meetings and webinars. I am also operational support for N3C meetings..	78
Collab.085	Nicholas	J.	Dobbins		University of Washington, Seattle, WA, USA			13	I'm the lead developer of Leaf and will be leading Leaf implementation and adaption for N3C deployment, as well as contributing to overall design and code.	8,9
Collab.086	Peter	L.	Elkin	https://orcid.org/0000-0001-9616-6811	Department of Biomedical Informatics, University at Buffalo, Buffalo, NY, USA	Department of Veterans Affairs, Western New York, NY, USA	Faculty of Engineering, University of Southern Denmark, Odense, , DEN	57,58,59	I have worked on the Analytic methods and for that workstream. I have worked with the data ingestion group and provided input to many of the other workstreams. I have edited the manuscript and provided content for the Codification and ReCodification Section of the manuscript. I have worked with a number of hubs to ensure that their data contributions include codified lab test names, clinical prob…	15,52,100
Collab.087	Peter	J.	Embi	https://orcid.org/0000-0002-7733-0847	Regenstrief Institute, Indianapolis, IN, USA	Indiana University School of Medicine, Indianapolis, IN, USA		60,61	I have contributed to the N3C consortium by contributing to and/or lead key elements of the governance and operational data management processes, both for the limited and synthetic data workstreams, including chairing a governance sub-committee, enabling honest-broker functions, contribuitng to the creation of governance documents, and assisting with overall decision making. I also contributed to…	52,101
Collab.088	Julio	C.	Facelli	https://orcid.org/00000-0003-1449-477X	Center for Clinical and Transnational Science, The University of Utah, Salt Lake City, UT, USA			62	As PI of the Utah CCTS N3C project we have contributed data to N3C	8,15
Collab.089	Karamarie		Fecho	https://orcid.org/0000-0002-6704-9306	Copperline Professional Solutions, LLC, Chapel Hill, NC, USA	University of North Carolina at Chapel Hill, Chapel Hill, NC, USA		25,63	In reviewing the guidelines for consortial authors/contributors, I realize that I am obliged to report my level of involvement. Specifically, I contributed text on the NCATS Biomedical Data Translator program to the N3C paper. I have not been an active contributor to the N3C consortium itself, but rather I have been passively observing the consortium's work and cross-referencing it in related ini…	13
Collab.090	Xue		Feng	https://orcid.org/00000-0002-2181-9889	Department of Biomedical Engineering, University of Virginia, Charlottesville, VA, USA			64	Contributing code.	9
Collab.091	Randi	E.	Foraker		Washington University in St. Louis School of Medicine, St. Louis, MO, USA			65	Contributing data and drafting manuscript	8,13,15
Collab.092	Tamas	S.	Gal	https://orcid.org/0000-0002-6525-092X	Virginia Commonwealth University, Richmond, VA, USA			47	Contributing data.	8,15
Collab.093	Linqiang		Ge	https://orcid.org/0000-0003-0817-8850	Auburn University, Auburn, AL, USA			66	I reviewed and edited the manuscript and participated work groups	14
Collab.094	George		Golovko	https://orcid.org/0000-0003-4609-2767	The University of Texas Medical Branch, Galveston, TX, USA			67	Organized and facilitated data transfer for UTMB CTSA COVID19 Dataset, as well as prepared internal governance documents to get clearance for N3C data ingestion	15,101
Collab.095	Ramkiran		Gouripeddi	https://orcid.org/0000-0002-4345-9669	University of Utah, Salt Lake City, UT, USA			68	Contribute data, paper review.	14,15
Collab.096	Casey	S.	Greene		Department of Systems Pharmacology and Translational Therapeutics, Perelman School of Medicine, University of Pennsylvania, Philadelphia, PA, USA			69	Writing, Review and Editing Role http://purl.org/credit/ontology#CREDIT_00000014	13,14
Collab.097	Sangeeta		Gupta		Delaware State University, Dover, DE, USA			70	governance documents	52,101
Collab.098	Ashish		Gupta	https://orcid.org/0000-0003-4593-3261	Auburn University, Auburn, AL, USA			66	participating in decision making, document draft	13,101
Collab.099	Janos	G.	Hajagos	https://orcid.org/0000-0001-6251-9586	Stony Brook University, Stony Brook, NY, USA			71	I provided sample OHDSI 5.3 files and I have been developing analytic queries in the Unite enclave for Covid patients based on analyses run at Stony Brook.	9,15
Collab.100	David	A.	Hanauer		University of Michigan, Ann Arbor, MI, USA			72	Contributing data and providing expertise regarding data acquistion for COVID-related data for PCORnet, which is being used to populate N3C.	15,52
Collab.101	Jeremy	Richard	Harper	https://orcid.org/0000-0003-1244-8948	Regenstrief Institute, Indianapolis, IN, USA			60	I've been an active member of Phenotype and collaborative analytics workstreams and revised the methods manuscript text for those sections; reviewed and revised other documents and contributed to planning. etc	9,14,52
Collab.102	Nomi	L.	Harris		Environmental Genomics and Systems Biology Division, Lawrence Berkeley National Laboratory, Berkeley, CA, USA			73	I helped edit the manuscript.	14
Collab.103	Paul	A.	Harris		Vanderbilt University Medical Center, Nashville, TN, USA			43	I met with Chris Chute about lessons learned on governance from AoU program and also participated in numerous meetings with iEC Leads discussing the N3C platform and approach.	101
Collab.104	Mehadi	R.	Hassan		University of Washington, Seattle, WA, USA			13	Contributing to the research of tools and how they can/will help researchers. Providing support to implement tools.	9
Collab.105	Yongqun		He	https://orcid.org/0000-0001-9189-9661	University of Michigan Medical School, Ann Arbor, MI, USA			74	I contribute to the data modeling and standardization (esp. using ontology) and graph representation. I also contribute to the acute kidney injury (AKI) use case study.	15,52,100
Collab.106	Elaine	L.	Hill	https://orcid.org/0000-0003-2494-317X	University of Rochester Medical Center, Rochester, NY, USA			75	Active member of the Collaborative Analytics team; Read the paper and added a few minor changes, and have participated on Slack; hoping to be more involved going forward!	9,14
Collab.107	Maureen	E.	Hoatlin		Hoatlin Biomedical Consulting, Portland, OR, USA			76	Read and edited manuscript based on subject matter expertise in data analysis and virology	14
Collab.108	Kristi	L.	Holmes	https://orcid.org/0000-0001-8420-5254	Northwestern University Feinberg School of Medicine, Chicago, IL, USA			77	Participation in decision making, contributions to documents and other materials, role in resources, infrastructure, metadata, and information.	4,101
Collab.109	LaRon		Hughes		Center for Translational Data Science, University of Chicago, Chicago, IL, USA			78	writing review and editing role	14
Collab.110	Randeep	S.	Jawa		Renaissance School of Medicine, Stony Brook University, Stony Brook, NY, USA			79	Edited the manuscript, our institution will be contributing data.	14
Collab.111	Guoqian		Jiang		Mayo Clinic, Rochester, MN, USA			80	I contributed to creating the PCORNet CDM to OMOP CDM mappings and minor editing on manuscript.	14
Collab.112	Xia		Jing	https://orcid.org/0000-0002-1916-4588	Clemson University, Clemson, SC, USA			81	I review, edit the manuscript and contribute conceptual ideas to figures and graphs.	7,14
Collab.113	Marcin	P.	Joachimiak	https://orcid.org/0000-0001-8175-045X	Environmental Genomics and Systems Biology Division, Lawrence Berkeley National Laboratory, Berkeley, CA, USA			73	Contributed the KG-COVID-19 knowledge graph with team, participated in discussions about machine learning and platform design.	8,15
Collab.114	Steven	G.	Johnson	https://orcid.org/0000-0002-2983-6384	University of Minnesota, Minneapolis, MN, USA			82	Participated in N3C Governance and Analytics workgroups, reviewed manuscript	9,14,101
Collab.115	Rishikesan		Kamaleswaran	https://orcid.org/0000-0001-8366-4811	Emory University School of Medicine, Atlanta, GA, USA			83	Participated in discussions for defining analytics environment and underlying data engineering.	9,15,78
Collab.116	Thomas	George	Kannampallil	https://orcid.org/0000-0003-4119-4836	Institute for Informatics, Washington University in St. Louis, St. Louis, MO, USA			84	contributing to the data and its management	15,101
Collab.117	Andrew	S.	Kanter	https://orcid.org/0000-0002-4019-7894	Columbia University, New York, NY, USA			85	contributed experience and data to assist in data normalization and discussing terminology modeling	15,52
Collab.118	Ramakanth		Kavuluru	https://orcid.org/0000-0003-1238-9378	University of Kentucky, Lexington, KY, USA			86	I am part of the NLP and analytics streams of N3C to provide feedback on ML/DL/NLP aspects. I reviewed the paper and focused on changes in the "Collaborative Analytics" section.	9,13,14
Collab.119	Kamil		Khanipov	https://orcid.org/0000-0002-3881-737X	University of Texas Medical Branch, Galveston, TX, USA			12	Contributed in editing the manuscript and as a data submitter to N3C	8,14
Collab.120	Hadi		Kharrazi	http://orcid.org/0000-0003-1481-4323	Johns Hopkins School of Public Health, Baltimore, MD, USA			87	contributed to the review of the manuscript and drafted a section on population health analytics	9,14
Collab.121	Dongkyu		Kim	https://orcid.org/0000-0002-9221-2507	Children's National Hospital, Washington, DC, USA			88	Porting code for data extraction from ACT (i2b2)	15,52
Collab.122	Boyd	M.	Knosp	https://orcid.org/0000-0002-3834-3135	University of Iowa Institute for Clinical and Translational Science, The University of Iowa, Iowa City, IA, USA			20	contributing data	8,15
Collab.123	Arunkumar		Krishnan		Division of Gastroenterology and Hepatology, Johns Hopkins School of Medicine, Baltimore, MD, USA			89	Design	9
Collab.124	Tahsin		Kurc		Biomedical Informatics, Stony Brook University, Stony Brook, NY, USA			90	contributing to data and tools from Stony Brook University	9,15
Collab.125	Albert	M.	Lai	https://orcid.org/0000-0002-9241-2656	Institute for Informatics, Washington University in St. Louis, St. Louis, MO, USA			84	Contributing to the design of the synthetic data pipeline and participating in the data governance workstream.	101
Collab.126	Christophe	G.	Lambert	https://orcid.org/0000-0003-1994-2893	Department of Internal Medicine, Center for Global Health, Division of Translational Informatics, University of New Mexico Health Sciences Center, Albuquerque, NM, USA			91	Contributing institutional data, participating in decision-making, advising on OHDSI implementation	52,101
Collab.127	Michael		Larionov	https://orcid.org/0000-0002-8067-7817	Spok, Inc., Springfield, VA, USA			92	I suggested edits to the paper to improve clarity. Also fixed minor grammar errors.	14
Collab.128	Stephen	B.	Lee	https://orcid.org/0000-0002-6253-293X	University of Saskatchewan (Regina), Saskatoon, SK, CA			93	Participating in discussions and idea generation. Help with edits	1,14
Collab.129	Michael	D.	Lesh	https://orcid.org/00000-0001-6177-0103	University of California San Francisco, San Francisco, CA, USA	Syntegra.io, San Carlos, CA, USA		94,95	I will lead the effort to provide the Syntegra synthetic data engine to create and validate synthetic versions of COVID clinical data	9
Collab.130	Olivier		Lichtarge	https://orcid.org/0000-0003-4057-7122	Baylor College of Medicine, Houston, TX, USA			96	Contributing to consortial discussions and editing	14
Collab.131	John		Liu		Optum, Eden Prairie, MN, USA			97	Phenotype NLM SNOMED value sets	9
Collab.132	Sijia		Liu	https://orcid.org/0000-0001-9763-1164	Department of Health Sciences Research, Mayo Clinic, Rochester, MN, USA			98	I am the major contributor of the N3C cloud NLP engine: OHNLP MedTagger. I am participating decision making regarding its design on NLP architecture and algorithms.	8,9,101
Collab.133	Hongfang		Liu	https://orcid.org/0000-0003-2570-3741	Mayo Clinic, Rochester, MN, USA			80	Contributing to collaborative analytics working stream, leading NLP subgroup.	9,15
Collab.134	Johanna	J.	Loomba	https://orcid.org/0000-0003-3673-5423	University of Virginia, Charlottesville, VA, USA			99	Contributions have included conceptualization and definition of data access standards, as well as discussions are around infrastructure and methodology.	1,15,78,101
Collab.135	Sandeep	K.	Mallipattu	https://orcid.org/0000-0002-6324-7807	Stony Brook University, Stony Brook, NY, USA			71	Read the manuscript and our institution contributed to data and code for the N3C	9,14,15
Collab.136	Chaitanya	K.	Mamillapalli		Springfield clinic, Springfield, IL, USA			100	Editing and review of manuscript.	14
Collab.137	Christopher	E.	Mason		Weill Cornell Medicine, Cornell University, New York, NY, USA			49	Data and code contribution and overall design	15
Collab.138	Jomol	P.	Mathew		School of Medicine and Public Health, University of Wisconsin-Madison, Madison, WI, USA			101	Will Provide data; Will edit manuscript as needed	8,15,52
Collab.139	James	C.	McClay	https://orcid.org/0000-0002-3404-0671	University of Nebraska Medical Center, Omaha, NE, USA			102	Document editing, data contribution, NIGMS CTR consortium governance	101
Collab.140	Julie	A.	McMurry	https://orcid.org/0000-0002-9353-5498	Translational and Integrative Sciences Center, Dept. of Molecular Toxicology, Oregon State University, Corvallis, OR, USA			2	Paper contributions: conceptualization, writing, editing, figures; N3C contributions: operational data integration.	1,4,7,9,13,14,78
Collab.141	Paras	P.	Mehta	https://orcid.org/0000-0002-0233-9871	College of Medicine, The University of Arizona, Tucson, AZ, USA			103	manuscript editing and review	14
Collab.142	Ofer		Mendelevitch	https://orcid.org/00000-0003-1082-7047	Syntegra.io, San Carlos, CA, USA			95	I will be responsible for designing and implementing the Syntegra synthetic data engine for COVID19 clinical data.	9
Collab.143	Stephane		Meystre	https://orcid.org/0000-0002-7632-9625	Medical University of South Carolina, Charleston, SC, USA			104	Lead the local contribution of clinical data, helped pilot the administrative enrollment process and contributed to the manuscript review	8,14,15
Collab.144	Richard	A.	Moffitt		Department of Biomedical Informatics, Stony Brook University, Stony Brook, NY, USA			11	Code for Data curation, analysis, and visualization. Manuscript writing.	9,13,15
Collab.145	Jason	H.	Moore		Institute for Biomedical Informatics, University of Pennsylvania, Philadelphia, PA, USA			105	Contributed to the analytics design through weekly meetings, offered advice about how to maximize the effectiveness of the analytics, worked with the team at Penn Medicine to secure the approvals needed to share data.	8,9
Collab.146	Hiroki		Morizono	https://orcid.org/0000-0002-9678-5564	Children's National Hospital, Washington, DC, USA			88	HM contributed in a writing review and editing role, and as a data submitter role to N3C	13,14,15,52
Collab.147	Christopher	J.	Mungall		Environmental Genomics and Systems Biology Division, Lawrence Berkeley National Laboratory, Berkeley, CA, USA			73	Provision of COVID-19 Knowledge Graph	15,52
Collab.148	Monica	C.	Munoz-Torres	https://orcid.org/0000-0001-8430-6039	Translational and Integrative Sciences Center, Dept. of Molecular Toxicology, Oregon State University, Corvallis, OR, USA			2	Contributing to governance documents, contributing to design and deployment of N3C website, contributing to design and implementation of Project Management Pipeline, contributing with Project Management.	7,10,78
Collab.149	Andrew	J.	Neumann	https://orcid.org/0000-0002-4809-6289	Oregon State University, Corvallis, OR, USA			44	Contributing to design and implementation of Project Management Pipeline, contributing with Project Management of Workstreams and Sub Groups.	78
Collab.150	Xia		Ning	https://orcid.org/00000-0002-6842-1165	The Ohio State University, Columbus, OH, USA			106	I have contributed to the manuscript draft by providing comments and edits.	14
Collab.151	Jennifer	E.	Nyland	https://orcid.org/00000-0002-4549-3617	Penn State College of Medicine, Hershey, PA, USA			107	Contributing to writing review and editing.	13,14
Collab.152	Lisa		O'Keefe	https://orcid.org/0000-0003-1211-7583	Northwestern University, Chicago, IL, USA			108	Project Management for Phenotyping/Data Acquisition group	78
Collab.153	Anna		O'Malley		Palantir Technologies, Palo Alto, CA, USA			32	Engineering and configuring the Palantir platform	78
Collab.154	Shawn	T.	O'Neil	https://orcid.org/0000-0001-6220-7080	Oregon State University, Corvallis, OR, USA			44	Infrastructure coordination (fielding suggestions and questions to/from Palantir team and others), training	78
Collab.155	Jihad	S.	Obeid	https://orcid.org/0000-0002-7193-7779	Department of Public Health Sciences, Medical University of South Carolina, Charleston, SC, USA			109	coordination of data provision effort and regulatory approval at our institution, manuscript contribution and edits, data team supervision at our institution.	10,14,15
Collab.156	Elizabeth	L.	Ogburn		Department of Biostatistics, Johns Hopkins Bloomberg School of Public Health, Baltimore, MD, USA			110	thinking about how N3C can inform RCTs, introducing causal language where needed in the paper	13
Collab.157	Jimmy		Phuong	https://orcid.org/0000-0003-0956-8404	School of Medicine, Division of Biomedical and Health Informatics, University of Washington, Seattle, WA, USA			111	I helped navigate local data governance at UW, get approvals for the external IRB, extract and ingest the UW COVID OMOP limited data set into N3C, and helped co-champion and drive clinical scenarios and data analytics developments.	9,15,52,100,101
Collab.158	Jose D		Posada	https://orcid.org/0000-0003-3864-0241	Stanford University, Stanford, CA, USA			112	Aid in the efforts to prepare and contribute Stanford data to N3C on behalf of our CTSA	8,15
Collab.159	Prateek		Prasanna		Stony Brook University, Stony Brook, NY, USA			71	Contributed to manuscript, part of Stony Brook University team working on curation of certain data elements	14,52
Collab.160	Fred		Prior	https://orcid.org/0000-0002-6314-5683	University of Arkansas for Medical Sciences, Little Rock, AR, USA			37	Participating in work groups, implementing a project to link N3C data to COVID image data in TCIA, minor contributions to the manuscript.	9,14,15
Collab.161	Justin		Prosser	https://orcid.org/0000-0002-6358-5507	University of Washington, Seattle, WA, USA			13	I provide technical expertise with secure architectures and infrastructure	9,78
Collab.162	Amanda	Lienau	Purnell		VHA Innovation Ecosystem, Washington, DC, USA			113	participating in decision making and design	101
Collab.163	Ali		Rahnavard	https://orcid.org/0000-0002-9710-0248	Computational Biology Institute and Department of Biostatistics & Bioinformatics, Milken Institute School of Public Health, The George Washington University, Washington, DC, USA			56	Contributing in design, analyses, code, and methods development	9,52
Collab.164	Harish		Ramadas	https://orcid.org/0000-0002-9818-1625	Palantir Technologies, Palo Alto, CA, USA			32	I contributed code and logic to the modeling efforts, helped set up the Unite infrastructure and trained users.	9,52,78
Collab.165	Justin	T.	Reese		Environmental Genomics and Systems Biology Division, Lawrence Berkeley National Laboratory, Berkeley, CA, USA			73	I contributed original software and biological expertise (software engineering role, advisory role, statistical analysis role)	9,10
Collab.166	Jennifer	L.	Robinson	https://orcid.org/0000-0001-7389-3047	Auburn University, Auburn, AL, USA			66	Commented and provided editorial suggestions in the manuscript	14,100
Collab.167	Daniel	L.	Rubin		Stanford University, Stanford, CA, USA			112	I reviewed the paper and partipated in discussions and in decision-making	101
Collab.168	Cody	D.	Rutherford	https://orcid.org/0000-0001-8556-4013	Noblis, Inc, Reston, VA, USA			114	Contributions of governance and design reviews and documentation for data analytics.	9,101
Collab.169	Eugene	M.	Sadhu		University of Illinois at Chicago, Chicago, IL, USA			40	I have contributed to various CD2H & N3C related discussions and am preparing the data for submission from our site.	8,15
Collab.170	Amit		Saha	https://orcid.org/0000-0002-3542-4319	Wake Forest Baptist Medical, Winston Salem, NC, USA			115	Contributing code	9
Collab.171	Mary	Morrison	Saltz		Renaissance School of Medicine, Stony Brook University, Stony Brook, NY, USA			79	I have been instrumental in clinical support to develop code used to classify COVID subjects, their associated co-morbidities, treatment, medications and outcomes. This code will be used on the aggregated N3C data to perform similar analyses. In addition I have been particpating in the Governance process, ensuring that access to the data be fair and equitable for all, and as accessible as possibl…	15,52,101
Collab.172	Thomas		Schaffter	https://orcid.org/0000-0002-8242-9462	Sage Bionetworks, Seattle, WA, USA			6	Organizing the EHR COVID-19 DREAM Challenge	78
Collab.173	Titus	KL	Schleyer	https://orcid.org/0000-0003-1829-971X	Regenstrief Institute, Indianapolis, IN, USA			60	Detailed edits of draft of 6/15/2020.	14
Collab.174	Soko		Setoguchi		Biomedical and Health Sciences, Rutgers University, New Brunswick, NJ, USA			116	I have critically reviewed the manuscript and provided edits/suggestions. I am leading NJ ACTS (Rutgers CTSA's) effort to contibute our EHR data to the consortium,	8,14,15
Collab.175	Nigam	H.	Shah		Stanford University, Stanford, CA, USA			112	Lead efforts to prepare and contribute Stanford data to N3C on behalf of our CTSA	8,14
Collab.176	Noha		Sharafeldin	https://orcid.org/0000-0001-8835-8899	School of Medicine, University of Alabama at Birmingham, Birmingham, AL, USA			117	Read-proofed and provided edits to the manuscript draft	14
Collab.177	Evan		Sholle	https://orcid.org/0000-0001-9518-4399	Weill Cornell Medicine, Cornell University, New York, NY, USA			49	Contributed to data harmonization workflow by providing AMC-OMOP stakeholder perpsective	15,52
Collab.178	Jonathan	C.	Silverstein		Department of Biomedical Informatics, University of Pittsburgh School of Medicine, Pittsburgh, PA, USA			41	Participation in governance discussion and related documents and may be responsible for data contribution, and our team engagement with i2b2 to OMOP translation.	15,52,101
Collab.179	Anthony		Solomonides		Research Institute, NorthShore University HealthSystem, Evanston, IL, USA			118	Data contribution. I am very interested in creating a lay summary of the paper. Also using the paper for Data Governance permissions at NorthShore.	101
Collab.180	Julian		Solway	https://orcid.org/0000-0002-0898-8530	University of Chicago, Chicago, IL, USA			119	Participating in data partnership and governance committee and edited manuscript	14,101
Collab.181	Jing		Su	https://orcid.org/00000-0003-4917-6173	School of Medicine, Wake Forest University, Winston Salem, NC, USA			120	Participating in decision-making	101
Collab.182	Vignesh		Subbian	https://orcid.org/0000-0001-9974-8382	College of Engineering, The University of Arizona, Tucson, AZ, USA			121	I am part of two N3C workstreams (phenotype and analytics). I reviewed and provided feedback on the entire manuscript, including critical feedback on ethical issues related data sharing, governance, and analytics.	9,52,101
Collab.183	Hyo Jung		Tak	https://orcid.org/0000-0003-1925-3190	Department of Health Services Research and Administration, University of Nebraska Medical Center, Lincoln, NE, USA			122	Expansion of research field and data deployment	15
Collab.184	Bradley	W.	Taylor	https://orcid.org/0000-0002-6414-4172	Medical College of Wisconsin, Wauwatosa, WI, USA			123	I reviewed and edited the manuscript, participated in discussions for defining analytics environment, participating in work groups	9,14
Collab.185	Anne	E.	Thessen		Oregon State University, Corvallis, OR, USA			44	I contributed during governance meetings and editing manuscript text.	14,101
Collab.186	Jason	A.	Thomas	https://orcid.org/0000-0003-3892-7197	University of Washington, Seattle, WA, USA			13	I contributed with data collection, data curation, data quality assurance, data transformation, writing review and editing.	15
Collab.187	Umit		Topaloglu	https://orcid.org/0000-0002-3241-8773	School of Medicine, Wake Forest University, Winston Salem, NC, USA			120	I am the local PI for the N3C and waiting for PCORNet model to be finalized and also i participate the workstream meetings.	15,52
Collab.188	Deepak	R.	Unni		Environmental Genomics and Systems Biology Division, Lawrence Berkeley National Laboratory, Berkeley, CA, USA			73	Involved in integration of NCATS Data Translator resources into N3C. CRO:0000040, CRO:0000041, CRO:0000072	8,9,15,52
Collab.189	Joshua	T.	Vogelstein		Johns Hopkins University School of Medicine, Baltimore, MD, USA			19	Made a number of minor suggestions to the text, have been in conversation with many other co-authors about various concepts presented in manuscript. "writing review and editing role", "modifier role"	14
Collab.190	Andréa	M.	Volz	https://orcid.org/0000-0002-1438-5664	Oregon Clinical and Translational Research Institute, Oregon Health & Science University, Portland, OR, USA			1	Provide communications (weekly updates, website content, edits to manuscript, SOPs, FAQs, meeting notes, etc.) for the N3C consortium.	7
Collab.191	David	A.	Williams	https://orcid.org/0000-0002-5052-4895	University of Michigan, Ann Arbor, MI, USA			72	data and manuscript review/edit	14,15
Collab.192	Kelli	M.	Wilson	https://orcid.org/0000-0003-2636-2766	National Center for Advancing Translational Sciences, National Institutes of Health, Bethesda, MD, USA			34	Palantir Unite platform trainer and assistance with setting up the Palantir environment	9,78
Collab.193	Clark	B.	Xu		University of Wisconsin-Madison, Madison, WI, USA			52	I am on the N3C Meetings for Collaborative Analytics, Data Ingestion and Harmonization, Portals and Dashboards. My team at University of Wisconsin-Madison created a COVID reporting dashboard for our partner institution UW Health (data modeling role, data transformation role)	8,9,15
Collab.194	Hua		Xu	https://orcid.org/0000-0002-5274-4672	The University of Texas Health Science Center at Houston, Houston, TX, USA			124	Editing the online document and co-leading the N3C Collaborative Analytics NLP subgroup	9,10,14
Collab.195	Yao		Yan		Molecular Engineering & Sciences Institute, University of Washington, Seattle, Seattle, WA, USA			125	I reviewed and edited the manuscript and contributed codes for COVID phenotyping.	9,15,52
Collab.196	Elizabeth		Zak	https://orcid.org/0000-0003-0021-0027	University of Iowa, Iowa City, IA, USA			126	I contributed data and gathered research resources and datasets.	8,15
Collab.197	Lanjing		Zhang		Rutgers University, New Brunswick, NJ, USA	Princeton Medical Center, Plainsboro, NJ, USA		127,128	contributing to design or governance documents	101
Collab.198	Chengda		Zhang	https://orcid.org/0000-0003-1616-4715	Oregon Health & Science University, Portland, OR, USA			129	I put in suggestion for editing of the paper.	14
Collab.199	Jingyi		Zheng		Auburn University, Auburn, AL, USA			66	participating in work groups. reviewing and editing manuscript	14
