# Supplementary material for: The National COVID Cohort Collaborative (N3C): Rationale, design, infrastructure, and deployment
Source: Oxford University Press journal article supplement (doi:10.1093/jamia/ocaa196), 2020-08-14
Supplement: ocaa196_supplementary_data.zip [file ocaa196_supplementary_data.zip › N3C-Attribution and Publication Policy-v1-FINAL.docx]

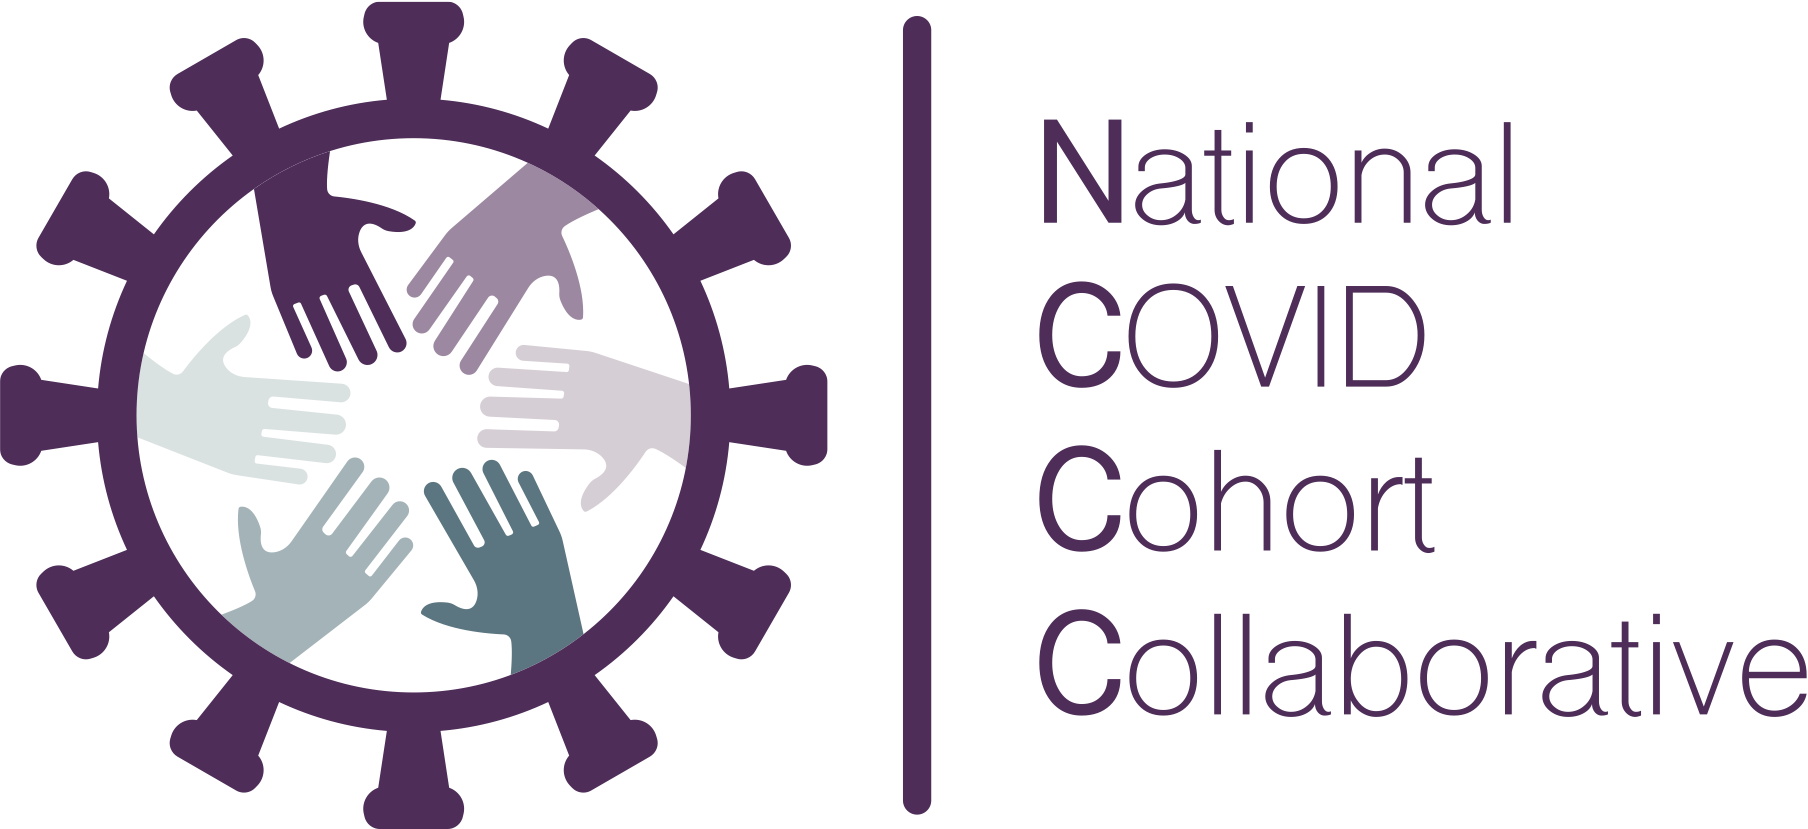


**Attribution and Publication Policy**

**(Will be made publicly available in Zenodo following NIH review)**

N3C members share a commitment to the dissemination of scientific knowledge for the public good, and to the advancement of science, and maintain an “it takes a village” philosophy. Therefore, N3C members intend to post their analyses on the N3C Enclave and publish their findings in independent preprints and peer-review publications.

**Purpose**: This policy defines the publication and attribution guidelines that apply to all N3C analysis reports, data, resources, abstracts, presentations, preprints, and publications arising from the use of content in N3C Enclave.

**Overview**: This policy is intended to enable the following:

- An open and collaborative environment within the Collaborative where all contributions are acknowledged;
- Sharing research results with N3C Members as soon as reasonable;
- Opportunities to publish in high-impact journals; and
- Intellectual property protection.

The responsibility to adhere to the attribution and publication policy falls upon the corresponding author or principal collaborator from N3C when the corresponding author is not a member of N3C.

This policy will be reviewed annually by N3C Leadership and modified or recertified as deemed necessary.

**
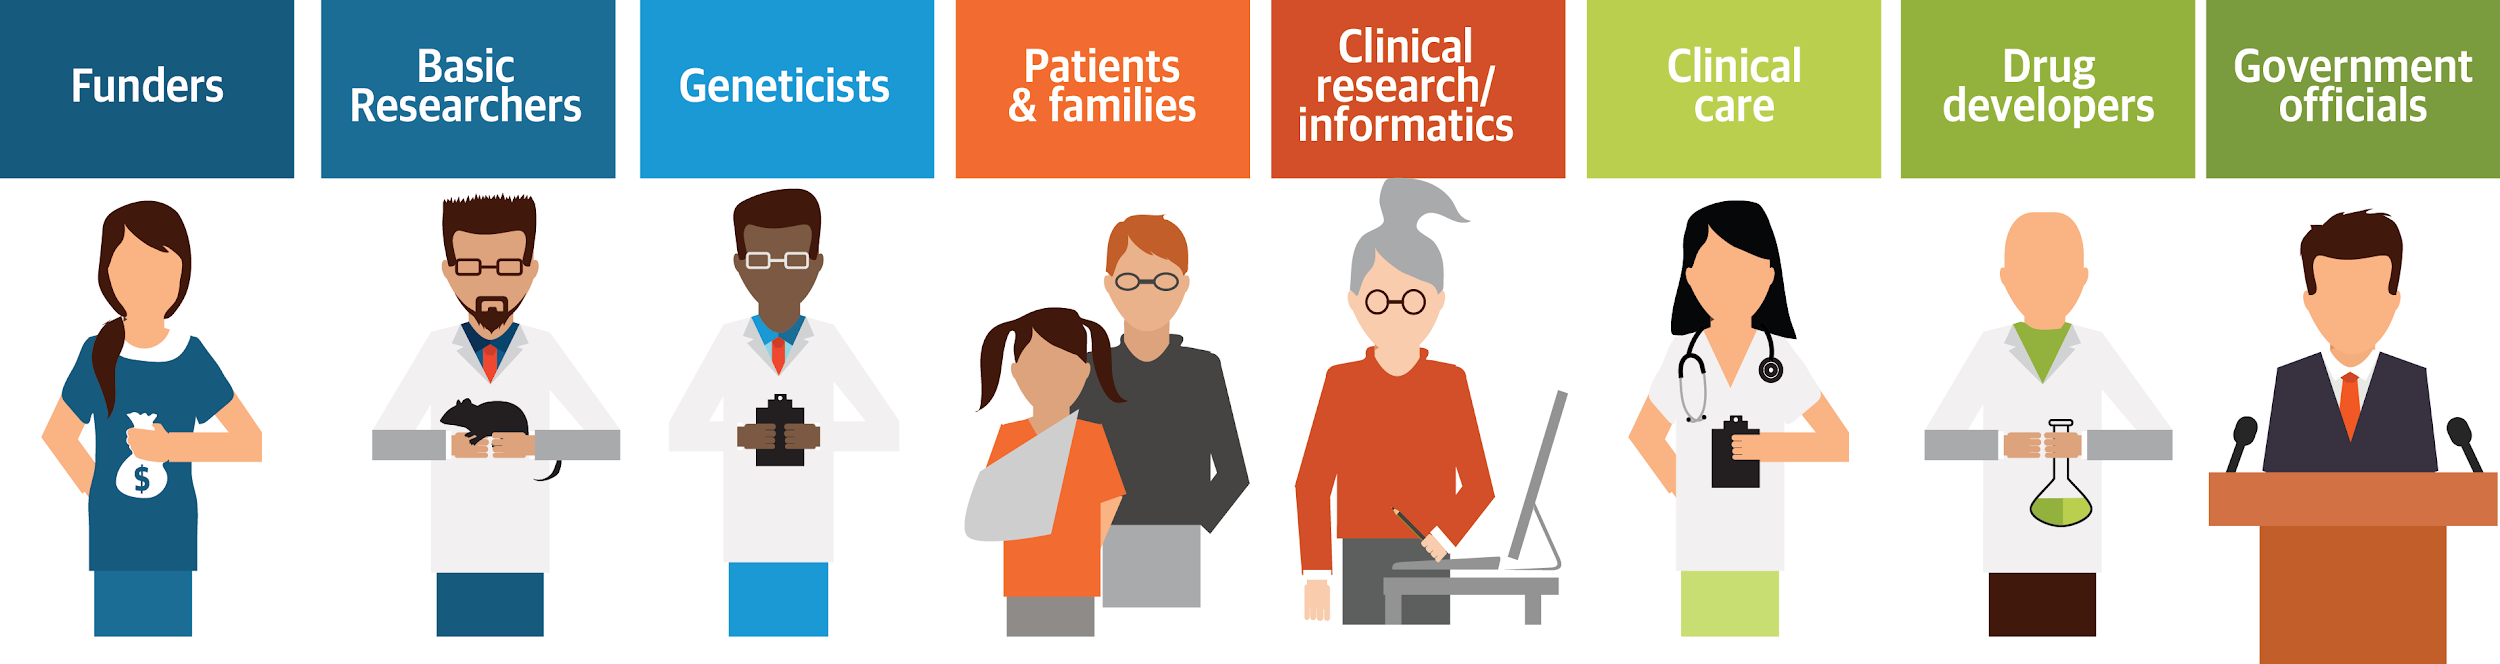
**

**Attribution Guidelines:** N3C presumes that everyone participating is dedicated to the goal of rapid knowledge generation and dissemination to help combat COVID-19. However, in order to simultaneously support career development and recognition, the N3C takes a preemptive approach to attributing and tracking all contributions to any result derived from the use of N3C. We believe that science does not have to wait for peer-review publication to demonstrate contribution and acknowledgment.

- The N3C Enclave supports robust tracking of provenance and attribution. All N3C Members (users and operators) shall be authenticated and all activity shall be recorded to enable auditing for security and acknowledging contributions.
- Every contributing organization will be listed on the N3C Enclave website
- [ORCIDs](https://orcid.org/) are required for individuals to participate in the N3C
- Members are expected to list all contributors to any Data or Resource that is ingested, as well as on any report or outcome, whether they touched the workflow or not.
- All workflows and their resulting reports will indicate all upstream contributors to data and code automatically.
- The N3C community will use the Contribution Role Ontology (CRO) and the [Contributor Attribution Model (CAM)](https://contributor-attribution-model.readthedocs.io/en/latest/) to capture the aforementioned granular contributions in N3C reports. The CAM is being developed by the NCATS Center for Data to Health (CD2H) and provides a simple data model for representing information about contributions made to research-related artifacts - for example, a curator contributing to a gene annotation. We urge contributors to similarly use the CAM when they publish.

**Publication Guidelines**: An N3C Publications Committee will be established consisting of eight nominated members of the N3C community. Committee members shall be drawn from diverse contexts and will include a member of the NCATS media relations staff. The Publications committee’s role is largely to track the output of the N3C and facilitate inclusive and appropriate attribution, as well as to help troubleshoot any authorship conflicts or ethical questions.

- All publications must be approved by the N3C Publication Committee to ensure that authorship and contributions are in line with N3C principles and the publication complies with the terms delineated in the Data Use Agreement. Authors are expected to inform N3C of their plan for a manuscript for tracking purposes as early as possible and upload their complete manuscript for approval using the “Manuscript Concept Form”.
- N3C Members will strive to publish in open-access journals. Published manuscripts should also be submitted to PubMed Central to be made publicly available immediately upon acceptance to publication without an embargo period.
- Every draft manuscript will include an “Authors Contribution” section that specifies the role of each team member, whether or not this section is included in the final submission (See Attribution Guidelines).
- All N3C conference abstracts and podium presentations need not receive approval from the Publications Committee. However, such publications are strongly recommended to be submitted for N3C impact tracking. We also recommend an open review or comment period, 48 hours in advance of abstract submission or presentation. The Manuscript Concept Form should be used to submit requests for review and tracking.
- Every draft manuscript abstract and podium presentation shared within N3C prior to publication must be treated as confidential. This includes, but is not limited to, information shared via the Manuscript Concept Form.
- Access to N3C Enclave resources does not imply endorsement of the research project and/or results by NIH or the NCATS.

**Press releases**: Brief announcements about the N3C Enclave or a finding that was made possible by an N3C component that is intended for distribution to media outlets may not represent N3C as a whole. Press releases should be submitted to the Publication Committee. The information will be used for tracking, preparing for media coverage, and for NCATS review.

**Attribution and Authorship**: Data contribution does not provide automatic authorship on the data user’s manuscript. The authors are encouraged to follow the [ICJME standards.](http://www.icmje.org/) Co-authorships should reflect a common-sense assessment, but in general, should reflect substantial work or intellectual contributions to the topic of the publication. Any team member can request to be included as an author on any project output. In general, we choose to take an inclusive approach to authorship, with contributions including any type or size of intellectual contribution. Authors are expected to do at least one of the following: edit or write manuscript; provide data, figure, or table; provide critical ideas; and write code. Students and postdocs are encouraged to participate in these discussions.

**Acknowledgments**: Please include the following acknowledgment language in all publications and preprints. Use only the relevant grant numbers.

“ Components used in the analysis described in this manuscript (*publication /report /presentation*) were obtained through the N3C Enclave supported by the NCATS < *enter grant number*>. The research was supported by <*funding agencies or sources and reference numbers*>. This research would not be possible without the N3C contributors <*link to the list of N3C organizations*> and individuals who have shared their information. Any opinions expressed in this document are those of the authors and do not necessarily reflect the views of NCATS, individual N3C team members, or affiliated organizations and institutions.”
