# Supplementary material for: The National COVID Cohort Collaborative (N3C): Rationale, design, infrastructure, and deployment
Source: Oxford University Press journal article supplement (doi:10.1093/jamia/ocaa196), 2020-08-14
Supplement: ocaa196_supplementary_data.zip [file ocaa196_supplementary_data.zip › n3c-collaborators-2020-06-23.csv]

ORDER	First name as you wish it to appear	(Optional) Middle name or initial as you wish it to appear	Last name as you wish it to appear	ORCID	Email Address	Institutional Affiliation as you wish it to appear					Your contribution
Collab001	Shaymaa		Al-Shukri		salshukri@uams.edu	University of Arkansas for Medical Sciences					attending multiple workstream meetings and webinars, contributing data
Collab002	Adil		Alaoui		alaoui@georgetown.edu	Georgetown University					COntributing to data governance principles and N3C data access
Collab003	Benjamin		Amor		bamor@palantir.com	Palantir Technologies					Engineering and workflow lead for the Foundry software backing the N3C platform
Collab004	Ahmad		Baghal	https://orcid.org/0000-0003-0389-0021	abaghal@uams.edu	University of Arkansas for Medical Sciences					Contributing data from institutional EDW.
Collab005	Pamela	D	Banning		pdbanning@mmm.com	3M Health Information Systems					Focused on the laboratory data specific comments and plans for analysis; including surveillance for impending inflammatory tipping point leading to cytokine storm syndrome/hemodynamics instability and other ways in which laboratory values can help COVID-19 patient management.
Collab006	Edward	M	Barbour	https://orcid.org/0000-0002-2962-607X	barboure@uic.edu	University of Illinois at Chicago					Contributor of data to the N3C consortium
Collab007	Michael	J.	Becich	https://orcid.org/0000-0001-5998-8074	becich@pitt.edu	University of Pittsburgh School of Medicien					I lead (as chair) the iEC lead team and connect CTSA hubs to CD2H and N3C. I am a collaborator in all five N3C workstream actively exchanging ideas and expertise. A team I lead is also contributing the ACT COVID phenotype and data pipelines for other N3C sites.
Collab008	Afshin		Beheshti	https://orcid.org/0000-0003-4643-531X	afshin.beheshti@nasa.gov	KBR, Space Biosciences Division, NASA Ames Research Center, Moffett Field, CA, USA					Provided edits to the manuscript.
Collab009	Gordon	R.	Bernard	#N/A	gordon.bernard@vumc.org	Vanderbilt University Medical Center					Significant data contribution.
Collab010	Sharmodeep		Bhattacharyya	https://orcid.org/0000-0001-5011-4119	bhattash@science.oregonstate.edu	Oregon State University					Contributions in developing clinical scenarios
Collab011	L. Ebony		Boulware	#N/A	ebony.boulware@duke.edu	Duke University					Document review, contribution to ideas on use cases
Collab012	samuel		bozzette		sam.bozzette@nih.gov	NCATS					Participated in governance and clinical groups
Collab013	Donald	E.	Brown	https://orcid.org/0000-0002-9140-2632	deb@virginia.edu	School of Data Science, University of Virginia					Provided a series of inputs to the draft DUA that were both wording suggestions and areas requiring further delineation and also provided input on how synthetic data should be considered in the DUA.
Collab014	John	B	Buse	https://orcid.org/0000-0002-9723-3876	jbuse@med.unc.edu	University of North Carolina School of Medicine					Reviewed and edited content of the manuscript, provided advice and assistance in setting up the collaborative and work teams
Collab015	Brian	J	Bush		bjbush@vcu.edu	Virginia Commonwealth University					contribution of data and revision of governance documents
Collab016	Tiffany	J.	Callahan	https://orcid.org/0000-0002-8169-9049	callahantiff@gmail.com	Computational Bioscience, University of Colorado Anschutz Medical Campus					Provide detailed editing of manuscript, converted figures into tables, and helped with generation/formatting/maintenance of all citations via PaperPile
Collab017	Thomas	R	Campion		thc2015@med.cornell.edu	Weill Cornell Medicine					Contributing data from New York City
Collab018	Elena		Casiraghi	https://orcid.org/00000-0003-2024-7572	elena.casiraghi@unimi.it	Computer Science Department, Università degli Studi di Milano					code contribution, statistical analysis of patient data, deep learning for text context classification, deep learning for image classification, radiomics
Collab019	Ammar	A	Chaudhry	https://orcid.org/0000-0002-2126-0587	ammarchaudhry84@gmail.com	City of Hope National Medical Center					contributed to the review of the manuscript and contributed to the discussion section of the manuscript,
Collab020	Guanhua		Chen		gchen25@wisc.edu	University of Wisconsin-Madison					participating in Collaborative Analytics
Collab021	Anjun		Chen	https://orcid.org/0000-0003-1528-1928	ajchen@web2express.org	Web2express.org					In addition to participating in workstream calls and discussions, I added a "patient matching" use case under the enabled analyses section in the paper, for which I am working on connecting N3C analysis results to free real-time clinical collaboration tools for rapid and wide dissemination.
Collab022	Gari	D	Clifford	https://orcid.org/0000-0002-5709-201X	gari@dbmi.emory.edu	Emory University and Georgia Institute of Technology					contributing data
Collab023	Megan	P	Coffee		megan.coffee@nyulangone.org	NYU Grossman School of Medicine					I edited and added additions related to the clinical applications of this consortium.
Collab024	Tom		Conlin	https://orcid.org/0000-0003-0355-5581	tomc@tislab.org	OSU TISLab					port schema to opersource database; minor edits
Collab025	Connor		Cook		cookcon@ohsu.edu	OHSU					Program Manager for CD2H, providing key operational support for the N3C initiative.
Collab026	Keith	A	Crandall	https://orcid.org/0000-0002-0836-3389	kcrandall@gwu.edu	Computational Biology Institute and Department of Biostatistics & Bioinformatics, Milken Institute School of Public Health, The George Washington University, Washington, DC					Contributions include participation in both the Phenotypes & Data Acquisition and Collaborative Analytics workflows, local data governance processing and data contribution, and manuscript review and editing.
Collab027	Mariam		Deacy	#N/A	Mariam.Deacy@nih.gov	NIH/NCATS					Project Management
Collab028	Racquel	R	Dietz		dietzr@ohsu.edu	Oregon Health & Science University					I am the key scheduler for all official N3C meetings and webinars. I am also operational support for N3C meetings..
Collab029	Nicholas	J	Dobbins		ndobb@uw.edu	University of Washington					I'm the lead developer of Leaf and will be leading Leaf implementation and adaption for N3C deployment, as well as contributing to overall design and code.
Collab030	Peter	L.	Elkin	https://orcid.org/0000-0001-9616-6811	elkinp@buffalo.edu	Department of Biomedical Informatics, University at Buffalo, Department of Veterans Affairs WNY VA, Faculty of Engineering University of Southern Denmark					I have worked on the Analytic methods and for that workstream. I have worked with the data ingestion group and provided input to many of the other workstreams. I have edited the manuscript and provided content for the Codification and ReCodification Section of the manuscript. I have worked with a number of hubs to ensure that their data contributions include codified lab test names, clinical prob…
Collab031	Peter	J.	Embi		pembi@regenstrief.org	Regenstrief Institute and Indiana University School of Medicine, Indianapolis, IN.					I have contributed to the N3C consortium by contributing to and/or lead key elements of the governance and operational data management processes, both for the limited and synthetic data workstreams, including chairing a governance sub-committee, enabling honest-broker functions, contribuitng to the creation of governance documents, and assisting with overall decision making. I also contributed to…
Collab032	Julio	C.	Facelli	https://orcid.org/00000-0003-1449-477X	julio.facelli@utah.edu	Center for Clinical and Transnational Science, The University of Utah					As PI of the Utah CCTS N3C project we have contributed data to N3C
Collab033	Karamarie		Fecho	https://orcid.org/0000-0002-6704-9306	kfecho@copperlineprofessionalsolutions.com	Copperline Professional Solutions, LLC; Renaissance Computing Institute, University of North Carolina at Chapel Hill					In reviewing the guidelines for consortial authors/contributors, I realize that I am obliged to report my level of involvement. Specifically, I contributed text on the NCATS Biomedical Data Translator program to the N3C paper. I have not been an active contributor to the N3C consortium itself, but rather I have been passively observing the consortium's work and cross-referencing it in related ini…
Collab034	Xue		Feng	https://orcid.org/00000-0002-2181-9889	xf4j@virginia.edu	Department of Biomedical Engineering, University of Virginia					Contributing code.
Collab035	Randi	E	Foraker		randi.foraker@wustl.edu	Washington University in St. Louis School of Medicine					Contributing data and drafting manuscript
Collab036	Tamas	S	Gal		tsgal@vcu.edu	Virginia Commonwealth University					Contributing data.
Collab037	Linqiang		Ge	https://orcid.org/0000-0003-0817-8850	lzg0048@auburn.edu	Auburn University					I reviewed and edited the manuscript and participated work groups
Collab038	George		Golovko	https://orcid.org/0000-0003-4609-2767	gegolovk@utmb.edu	The University of Texas Medical Branch					Organized and facilitaded data transfer for UTMB CTSA COVID19 Dataset, as well as prepared internal governance documents to get clearance for N3C data ingestion
Collab039	Ramkiran		Gouripeddi	https://orcid.org/0000-0002-4345-9669	ram.gouripeddi@utah.edu	University of Utah					Contribute data, paper review.
Collab040	Casey	S.	Greene		greenescientist@gmail.com	Department of Systems Pharmacology and Translational Therapeutics, Perelman School of Medicine, University of Pennsylvania					Writing, Review and Editing Role http://purl.org/credit/ontology#CREDIT_00000014
Collab041	Sangeeta		Gupta		sangeetaguptaa@yahoo.com	Delaware State University					governance documents
Collab042	Ashish		Gupta	https://orcid.org/0000-0003-4593-3261	azg0074@auburn.edu	Auburn University					participating in decision making, document draft
Collab043	Janos	G	Hajagos	https://orcid.org/0000-0001-6251-9586	janos.hajagos@stonybrook.edu	Stony Brook University					I provided sample OHDSI 5.3 files and I have been developing analytic queries in the Unite enclave for Covid patients based on analyses run at Stony Brook.
Collab044	David	A	Hanauer		hanauer@umich.edu	University of Michigan					Contributing data and providing expertise regarding data acquistion for COVID-related data for PCORnet, which is being used to populate N3C.
Collab045	Jeremy	Richard	Harper		harperjr@regenstrief.org	Regenstrief Institute					I've been an active member of Phenotype and collaborative analytics workstreams and revised the methods manuscript text for those sections; reviewed and revised other documents and contributed to planning. etc
Collab046	Nomi	L	Harris		nlharris@lbl.gov	Lawrence Berkeley National Laboratory					I helped edit the manuscript.
Collab047	Paul	A.	Harris		paul.a.harriss@vumc.org	Vanderbilt University Medical Center					I met with Chris Chute about lessons learned on governance from AoU program and also participated in numerous meetings with iEC Leads discussing the N3C platform and approach.
Collab048	Mehadi	R	Hassan		mh2727@uw.edu	University of Washington					Contributing to the research of tools and how they can/will help researchers. Providing support to implement tools.
Collab049	Yongqun		He	https://orcid.org/0000-0001-9189-9661	yongqunh@med.umich.edu	University of Michigan Medical School, Ann Arbor, MI 48109, USA					I contribute to the data modeling and standardization (esp. using ontology) and graph representation. I also contribute to the acute kidney injury (AKI) use case study.
Collab050	Elaine	L	Hill	https://orcid.org/0000-0003-2494-317X	elaine_hill@urmc.rochester.edu	University of Rochester Medical Center					Read the paper and added a few minor changes, and have participated on Slack; hoping to be more involved going forward!
Collab051	Maureen	E	Hoatlin	#N/A	hoatlinm@gmail.com	Hoatlin Biomedical Consulting					Read and edited manuscript based on subject matter expertise in data analysis and virology
Collab052	Kristi	L	Holmes	https://orcid.org/0000-0001-8420-5254	kristi.holmes@northwestern.edu	Northwestern University Feinberg School of Medicine					Participation in decision making, contributions to documents and other materials, role in resources, infrastructure, metadata, and information.
Collab053	LaRon		Hughes		hughesl@uchicago.edu	University of Chicago, Center for Translational Data Science					writing review and editing role
Collab054	Randeep	S	Jawa	#N/A	randeep.jawa@stonybrookmedicine.edu	Stony Brook University Renaissance School of Medicine					Edited the manuscript, our institution will be contributing data.
Collab055	Guoqian		Jiang		jiang.guoqian@mayo.edu	Mayo Clinic, Rochester, MN					I contributed to creating the PCORNet CDM to OMOP CDM mappings and minor editing on manuscript.
Collab056	Xia		Jing	https://orcid.org/0000-0002-1916-4588	xjing@clemson.edu	Clemson University					I review, ediit the manuscript and contribute conceptual ideas to figures and graphs.
Collab057	marcin	P.	Joachimiak	https://orcid.org/0000-0001-8175-045X	MJoachimiak@lbl.gov	Lawrence Berkeley National Laboratory, Environmental Genomics and Systems Biology Division					Contributed the KG-COVID-19 knowledge graph with team, participated in discussions about machine learning and platform design.
Collab058	Steven	G	Johnson	https://orcid.org/0000-0002-2983-6384	joh06288@umn.edu	University of Minnesota					Participated in N3C Governance and Analytics workgroups, reviewed manuscript
Collab059	Rishikesan		Kamaleswaran	https://orcid.org/0000-0001-8366-4811	rkamaleswaran@emory.edu	Emory University School of Medicine					Participated in discussions for defining analytics environment and underlying data engineering.
Collab060	Thomas	George	Kannampallil	https://orcid.org/0000-0003-4119-4836	thomas.k@wustl.edu	Institute for Informatics					contributing to the data and its management
Collab061	Andrew	S	Kanter	https://orcid.org/0000-0002-4019-7894	ask2164@cumc.columbia.edu	Columbia University					contributed experience and data to assist in data normalization and discussing terminology modeling
Collab062	Ramakanth		Kavuluru	https://orcid.org/0000-0003-1238-9378	ramakanth.sai@gmail.com	University of Kentucky					I am part of the NLP and analytics streams of N3C to provide feedback on ML/DL/NLP aspects. I reviewed the paper and focused on changes in the "Collaborative Analytics" section. I will continue to make further changes as needed.
Collab063	Kamil		Khanipov	https://orcid.org/0000-0002-3881-737X	kakhanip@utmb.edu	University of Texas Medical Branch					Contributed in editing the manuscript and as a data submitter to N3C
Collab064	Hadi		Kharrazi		kharrazi@jhu.edu	Johns Hopkins School of Public Health					contributed to the review of the manuscript and drafted a section on population health analytics
Collab065	Dongkyu		Kim	https://orcid.org/0000-0002-9221-2507	dkkim@childrensnational.org	Children's National Hospital					Porting code for data extraction from ACT (i2b2)
Collab066	Boyd	M	Knosp		boyd-knosp@uiowa.edu	University of Iowa Institute for Clinical and Translational Science					contributing data
Collab067	Arunkumar		Krishnan		akrish25@jhmi.edu	Division of Gastroenterology and Hepatology, Johns Hopkins School of Medicine					Design
Collab068	Tahsin		Kurc		tahsin.kurc@stonybrook.edu	Biomedical Informatics, Stony Brook University					contributing to data and tools from Stony Brook University
Collab069	Albert	M.	Lai	https://orcid.org/0000-0002-9241-2656	amlai@wustl.edu	Institute for Informatics, Washington University in St. Louis					Contributing to the design of the synthetic data pipeline and participating in the data governance workstream.
Collab070	Christophe	G.	Lambert	https://orcid.org/0000-0003-1994-2893	cglambert@unm.edu	University of New Mexico Health Sciences Center, Department of Internal Medicine, Center for Global Health, Division of Translational Informatics					Contributing institutional data, participating in decision-making, advising on OHDSI implementation
Collab071	Michael		Larionov	https://orcid.org/0000-0002-8067-7817	michael.larionov@spok.com	Spok, Inc.					I suggested edits to the paper to improve clarity. Also fixed minor grammar errors.
Collab072	Stephen	B	Lee	https://orcid.org/0000-0002-6253-293X	leestephenz@gmail.com	University of Saskatchewan (Regina)					Participating in discussions and idea generation. Help with edits
Collab073	Michael	D.	Lesh	https://orcid.org/00000-0001-6177-0103	michael@syntegra.io	Professor of Medicine, UCSF; CEO, Syntegra.io					I will lead the effort to provide the Syntegra synthetic data engine to create and validate synthetic versions of COVID clinical data
Collab074	Olivier		Lichtarge	https://orcid.org/0000-0003-4057-7122	lichtarge@bcm.edu	Baylor College of Medicine					Contributing to consortial discussions and editing
Collab075	Hongfang		Liu	https://orcid.org/0000-0003-2570-3741	liu.hongfang@mayo.edu	Mayo Clinic					Contributing to collaborative analytics working stream, leading NLP subgroup.
Collab076	Sijia		Liu	https://orcid.org/0000-0001-9763-1164	liu.sijia@mayo.edu	Department of Health Sciences Research, Mayo Clinic					I am the major contributor of the N3C cloud NLP engine: OHNLP MedTagger. I am participating decision making regarding its design on NLP architecture and algorithms.
Collab077	John		Liu		liuz@optum.com	Optum					Phenotype NLM SNOMED value sets
Collab078	Johanna	J	Loomba		jjl4d@virginia.edu	University of Virginia					Contributions have included conceptualization and definition of data access standards, as well as discussions are around infrastructure and methodology.
Collab079	Sandeep	K.	Mallipattu	https://orcid.org/0000-0002-6324-7807	sandeep.mallipattu@stonybrookmedicine.edu	Stony Brook University					Read the manuscript and our institution contributed to data and code for the N3C
Collab080	Chaitanya	K	Mamillapalli		cmamillapalli@gmail.com	Endocrinologist, Springfield clinic					Editing and review of manuscript.
Collab081	Amin		Manna	https://orcid.org/0000-0002-4711-2128	amanna@palantir.com	Palantir Technologies					Technical lead of UNITE (N3C Enclave) environment
Collab082	Christopher	E	Mason	#N/A	chm2042@med.cornell.edu	Weill Cornell Medicine					Data and code contribution and overall design
Collab083	Jomol	P	Mathew		Jomol.Mathew@wisc.edu	University of Wisconsin School of Medicine and Public Health					Will Provide data; Will edit manuscript as needed
Collab084	James	C	McClay	https://orcid.org/0000-0002-3404-0671	jmcclay@unmc.edu	University of Nebraska Medical Center					Document editing, data contribution, NIGMS CTR consortium governance
Collab085	Julie	A	McMurry	https://orcid.org/0000-0002-9353-5498	mcmurryj@oregonstate.edu	Linus Pauling Institute, Dept. of Environmental and Molecular Toxicology, Oregon State University. Corvallis, OR, 97331, USA.					Paper contributions: conceptualization, writing, editing, figures; N3C contributions: operational data integration.
Collab086	Paras	P	Mehta	https://orcid.org/0000-0002-0233-9871	parasmehta@email.arizona.edu	University of Arizona College of Medicine - Tucson					manuscript editing and review
Collab087	Ofer		Mendelevitch	https://orcid.org/00000-0003-1082-7047	ofer@syntegra.io	CTO, Syntegra.io					I will be responsible for designing and implementing the Syntegra synthetic data engine for COVID19 clinical data.
Collab088	Stephane		Meystre	https://orcid.org/0000-0002-7632-9625	meystre@musc.edu	Medical University of South Carolina					Lead the local contribution of clinical data, helped pilot the administrative enrollment process and contributed to the manuscript review
Collab089	Richard	A	Moffitt		richard.moffitt@stonybrookmedicine.edu	Stony Brook University Department of Biomedical Informatics					Code for Data curation, analysis, and visualization. Manuscript writing.
Collab090	Jason	H	Moore		jhmoore@upenn.edu	Institute for Biomedical Informatics, University of Pennsylvania, Philadelphia, PA 19087					Contributed to the analytics design through weekly meetings, offered advice about how to maximize the effectiveness of the analytics, worked with the team at Penn Medicine to secure the approvals needed to share data.
Collab091	Hiroki		Morizono	https://orcid.org/0000-0002-9678-5564	hmorizono@childrensnational.org	Children's National Hospital					HM contributed in a writing review and editing role, and as a data submitter role to N3C
Collab092	Christopher	J	Mungall		cjmungall@lbl.gov	Lawrence Berkeley National Laboratory					Provision of COVID-19 Knowledge Graph
Collab093	Monica	C	Munoz-Torres	https://orcid.org/0000-0001-8430-6039	munoztmo@oregonstate.edu	Linus Pauling Institute, Dept. of Environmental and Molecular Toxicology, Oregon State University. Corvallis, OR, 97331, USA.					Contributing to governance documents, contributing to design and deployment of N3C website, contributing to design and implementation of Project Management Pipeline, contributing with Project Management.
Collab094	Andrew	J	Neumann	https://orcid.org/0000-0002-4809-6289	neumaand@oregonstate.edu	Oregon State University					Contributing to design and implementation of Project Management Pipeline, contributing with Project Management of Workstreams and Sub Groups.
Collab095	Xia		Ning	https://orcid.org/00000-0002-6842-1165	ning.104@osu.edu	The Ohio State University					I have contributed to the manuscript draft by providing comments and edits.
Collab096	Jennifer	E	Nyland	https://orcid.org/00000-0002-4549-3617	jnyland@pennstatehealth.psu.edu	Penn State College of Medicine					Contributing to writing review and editing.
Collab097	Lisa		O'Keefe	https://orcid.org/0000-0003-1211-7583	lisa.okeefe@gmail.com	Northwestern University					Project Management for Phenotyping/Data Acquisition group
Collab098	Shawn	T	O'Neil		oneils@oregonstate.edu	Oregon State University					Infrastructure coordination (fielding suggestions and questions to/from Palantir team and others) - hopefully more in the future!
Collab099	Jihad	S	Obeid	https://orcid.org/0000-0002-7193-7779	jobeid@musc.edu	Department of Public Health Sciences, Medical Univeristy of South Carolina					coordination of data provision effort and regulatory approval at our institution, manuscript contribution and edits, data team supervision at our institution.
Collab100	Elizabeth	L.	Ogburn		eogburn@jhsph.edu	Department of Biostatistics, Johns Hopkins Bloomberg School of Public Health					thinking about how N3C can inform RCTs, introducing causal language where needed in the paper
Collab101	Jimmy		Phuong	https://orcid.org/0000-0003-0956-8404	jphuong@uw.edu	University of Washington, School of Medicine, Division of Biomedical and Health Informatics					I helped navigate local data governance at UW, get approvals for the external IRB, extract and ingest the UW COVID OMOP limited data set into N3C, and helped co-champion and drive clinical scenarios and data analytics developments.
Collab102	Jose D		Posada	https://orcid.org/0000-0003-3864-0241	jdposada@stanford.edu	Stanford University					Aid in the efforts to prepare and contribute Stanford data to N3C on behalf of our CTSA
Collab103	Prateek		Prasanna		prateek.prasanna@stonybrook.edu	Stony Brook University					Contributed to manuscript, part of Stony Brook University team working on curation of certain data elements
Collab104	Fred		Prior	https://orcid.org/0000-0002-6314-5683	FWPrior@uams.edu	University of Arkansas for Medical Sciences					Participating in work groups, implementing a project to link N3C data to COVID image data in TCIA, minor contributions to the manuscript.
Collab105	Justin		Prosser	https://orcid.org/0000-0002-6358-5507	jprosser@uw.edu	University of Washington					I provide technical expertise with secure architectures and infrastructure
Collab106	Amanda	Lienau	Purnell		amandalienau@gmail.com	VHA Innovation Ecosystem					participating in decision making and design
Collab107	Ali		Rahnavard	https://orcid.org/0000-0002-9710-0248	rahnavard@gwu.edu	Computational Biology Institute and Department of Biostatistics & Bioinformatics, Milken Institute School of Public Health, The George Washington University, Washington, DC					Contributing in design, analyses, code, and methods development
Collab108	Harish		Ramadas	https://orcid.org/0000-0002-9818-1625	hramadas@palantir.com	Palantir Technologies					I contributed code and logic to the modeling efforts, helped set up the Unite infrastructure and trained users.
Collab109	Justin	T	Reese		justaddcoffee@gmail.com	Lawrence Berkeley National Laboratory					I contributed original software and biological expertise (software engineering role, advisory role, statistical analysis role)
Collab110	Jennifer	L.	Robinson	https://orcid.org/0000-0001-7389-3047	jrobinson@auburn.edu	Auburn University					Commented and provided editorial suggestions in the manuscript
Collab111	Daniel	L.	Rubin		dlrubin@stanford.edu	Stanford University					I reviewed the paper and partipated in discussions and in decision-making
Collab112	Cody	D	Rutherford	https://orcid.org/0000-0001-8556-4013	cody.rutherford@noblis.org	Noblis, Inc					Contributions of governance and design reviews and documentation for data analytics.
Collab113	Eugene	M.	Sadhu		eugsadhu@uic.edu	University of Illinois at Chicago					I have contributed to various CD2H & N3C related discussions and am preparing the data for submission from our site.
Collab114	Amit		Saha	https://orcid.org/0000-0002-3542-4319	aksaha@wakehealth.edu	Wake Forest Baptist Medical					Contributing code
Collab115	Mary	Morrison	Saltz		mary.saltz@stonybrookmedicine.edu	Renaissance School of Medicine, Stony Brook University					I have been instrumental in clinical support to develop code used to classify COVID subjects, their associated co-morbidities, treatment, medications and outcomes. This code will be used on the aggregated N3C data to perform similar analyses. In addition I have been particpating in the Governance process, ensuring that access to the data be fair and equitable for all, and as accessible as possibl…
Collab116	Thomas		Schaffter	https://orcid.org/0000-0002-8242-9462	thomas.schaffter@sagebionetworks.org	Sage Bionetworks					Organizing the EHR COVID-19 DREAM Challenge
Collab117	Titus	KL	Schleyer	https://orcid.org/0000-0003-1829-971X	schleyer@regenstrief.org	Regenstrief Institute					Detailed edits of draft of 6/15/2020.
Collab118	Soko		Setoguchi		soko.setoguchi@rutgers.edu	Rutgers Biomedical and Health Sciences					I have critically reviewed the manuscript and provided edits/suggestions. I am leading NJ ACTS (Rutgers CTSA's) effort to contibute our EHR data to the consortium,
Collab119	Nigam	H	Shah		nigam@stanford.edu	Stanford University					Lead efforts to prepare and contribute Stanford data to N3C on behalf of our CTSA
Collab120	Noha		Sharafeldin	https://orcid.org/0000-0001-8835-8899	nsharaf@uab.edu	School of Medicine, University of Alabama at Birmingham					Read-proofed and provided edits to the manuscript draft
Collab121	Evan		Sholle		evs2008@med.cornell.edu	Weill Cornell Medicine					Contributed to data harmonization workflow by providing AMC-OMOP stakeholder perpsective
Collab122	Jonathan	C.	Silverstein		j.c.s@pitt.edu	Department of Biomedical Informatics, University of Pittsburgh School of Medicine					Participation in governance discussion and related documents and may be responsible for data contribution, and our team engagement with i2b2 to OMOP translation.
Collab123	Julian		Solway	https://orcid.org/0000-0002-0898-8530	jsolway@medicine.bsd.uchicago.edu	University of Chicago					Participating in data partnership and governance committee and edited manuscript
Collab124	Jing		Su	https://orcid.org/00000-0003-4917-6173	jsu@wakehealth.edu	Wake Forest School of Medicine					Participating in decision-making
Collab125	Vignesh		Subbian	https://orcid.org/0000-0001-9974-8382	vsubbian@arizona.edu	College of Engineering, The University of Arizona, Tucson, Arizona, USA					I am part of two N3C workstreams (phenotype and analytics). I reviewed and provided feedback on the entire manuscript, including critical feedback on ethical issues related data sharing, governance, and analytics.
Collab126	Hyo Jung		Tak	https://orcid.org/0000-0003-1925-3190	hyojung.tak@unmc.edu	Department of Health Services Research and Administration, University of Nebraska Medical Center					Expansion of research field and data deployment
Collab127	Bradley	W	Taylor	https://orcid.org/0000-0002-6414-4172	btaylor@mcw.edu	Medical College of Wisconsin					I reviewed and edited the manuscript, participated in discussions for defining analytics environment, participating in work groups
Collab128	Anne	E	Thessen		annethessen@gmail.com	Oregon State University					I contributed during governance meetings and editing manuscript text.
Collab129	Jason	A	Thomas	https://orcid.org/0000-0003-3892-7197	thomasjt@uw.edu	University of Washington					I contributed with data collection, data curation, data quality assurance, data transformation, writing review and editing.
Collab130	Umit		Topaloglu	https://orcid.org/0000-0002-3241-8773	umit.topaloglu@wakehealth.edu	Wake Forest University School of Medicine					I am the local PI for the N3C and waiting for PCORNet model to be finalized and also i participate the workstream meetings.
Collab131	Deepak	R	Unni		deepak.unni3@lbl.gov	Environmental Genomics and Systems Biology, Lawrence Berkeley National Laboratory, Berkeley, CA 94710, USA					Involved in integration of NCATS Data Translator resources into N3C. CRO:0000040, CRO:0000041, CRO:0000072
Collab132	Joshua	T	Vogelstein		jovo@jhu.edu	Johns Hopkins University					Made a number of minor suggestions to the text, have been in conversation with many other co-authors about various concepts presented in manuscript. "writing review and editing role", "modifier role"
Collab133	Andréa	M.	Volz		volz@ohsu.edu	Oregon Health & Science University (OHSU)					Provide communications (weekly updates, website content, edits to manuscript, SOPs, FAQs, meeting notes, etc.) for the N3C consortium.
Collab134	David	A.	Williams	https://orcid.org/0000-0002-5052-4895	daveawms@umich.edu	University of Michigan					data and manuscript review/edit
Collab135	Kelli	M	Wilson	https://orcid.org/0000-0003-2636-2766	kelli.wilson@nih.gov	NCATS					Palantir Unite platform trainer and assistance with setting up the Palantir environment
Collab136	Hua		Xu	https://orcid.org/0000-0002-5274-4672	hua.xu@uth.tmc.edu	The University of Texas Health Science Center at Houston					Editing the online document and co-leading the N3C Collaborative Analytics NLP subgroup
Collab137	Yao		Yan		yanyao@uw.edu	Molecular Engineering & Sciences Institute, University of Washington, Seattle					I reviewed and edited the manuscript and contributed codes for COVID phenotyping.
Collab138	Elizabeth		Zak		ezak@uiowa.edu	University of Iowa					I contributed data and gathered research resources and datasets.
Collab139	Lanjing		Zhang		lanjing.zhang@rutgers.edu	Rutgers University and Princeton Medical Center, NJ					contributing to design or governance documents
Collab140	Chengda		Zhang	https://orcid.org/0000-0003-1616-4715	zhangcd07@outlook.com	Oregon Health and Science University					I put in suggestion for editing of the paper.
Collab141	Jingyi		Zheng		jzz0121@auburn.edu	Auburn University					participating in work groups. reviewing and editing manuscript
