# Supplementary material for: The National COVID Cohort Collaborative (N3C): Rationale, design, infrastructure, and deployment
Source: Oxford University Press journal article supplement (doi:10.1093/jamia/ocaa196), 2020-08-14
Supplement: ocaa196_supplementary_data.zip [file ocaa196_supplementary_data.zip › N3C-Community Guiding Principles.docx]

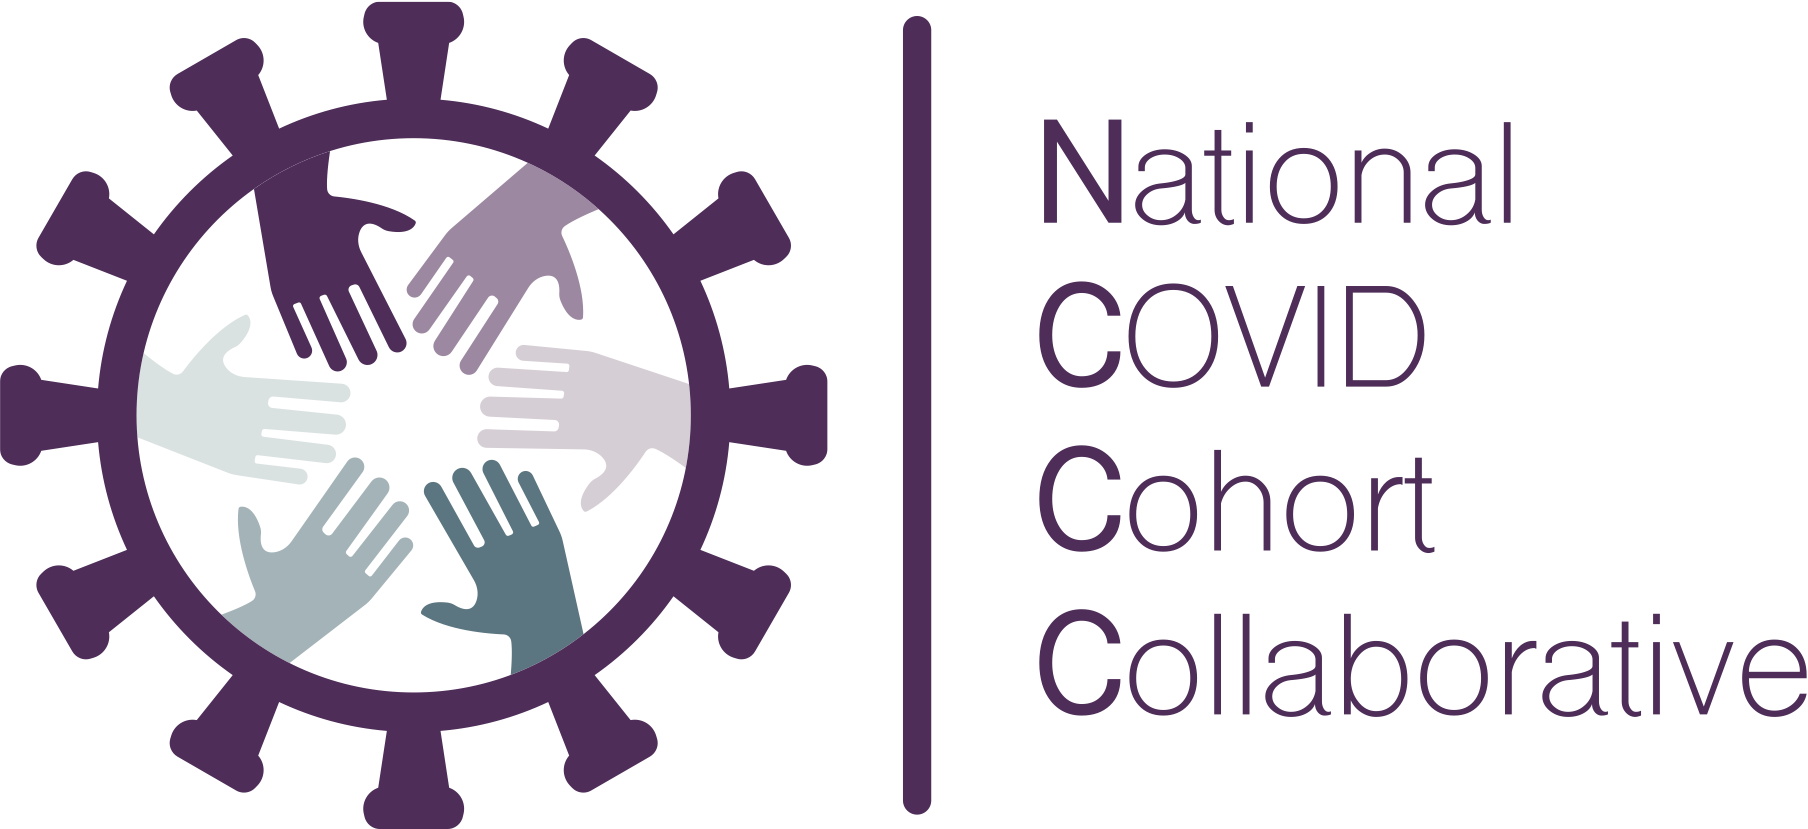


# **N3C Community Guiding Principles**

**(Will be made publicly available in Zenodo following NIH review)**

This Community Guiding Principles document outlines expectations of every N3C community member, which includes, institutions and individuals who use N3C resources, expertise, and data. The N3C community is committed to providing a welcoming and inspiring environment for all community members, and we expect these guiding principles to be honored by each community member. Herein, we provide specifics regarding appropriate conduct, including recommendations for conflict resolution.

N3C is built on principles of Partnership, Inclusivity, Transparency, Reciprocity, Accountability, and Security:

- **Partnership:** N3C members are trusted partners committed to honoring the N3C community guiding principles and Code of Conduct
- **Inclusivity:** N3C is open to any organization that wishes to contribute data. N3C also welcomes any registered member conducting authorized COVID-19 related research, including citizen and community scientists
- **Transparency:** Open and reproducible research is the hallmark of N3C. Access to data is project-based. Descriptions of projects are posted and searchable to promote collaborations.
- **Reciprocity:** Contributions are acknowledged and results from analyses, including provenance and attribution, are expected to be shared with the N3C community.
- **Accountability:** N3C members take responsibility for their activity and hold each other accountable for achieving the N3C objectives
- **Security:** Activities are conducted in a secure, controlled access cloud-based environment, and are recorded for auditing and attribution purposes.

Members of the N3C community have diverse sets of skills, personalities, and experiences. The N3C community is open and positive. We expect each member to honor these guiding principles, follow our community standards, and treat each other with respect and courtesy. We do not tolerate harassment.

Our community standards: All members of the N3C Community commit to:

● Welcome others.

● Use inclusive language.

● Share experiences and knowledge.

● Respect other viewpoints and ideas.

● Show empathy and kindness when interacting with others.

Here are examples of behavior that do not meet the N3C Guiding Principles:

● Insulting or derogatory comments.

● Personal or political attacks.

● Trolling.

● Sexual language or images.

● Sharing private information without permission.

Participating in N3C is a choice. We reserve the right to reject contributions that are not aligned with these guiding principles. We may also ban temporarily or permanently any member whose behavior we deem inappropriate, threatening, offensive, or harmful.

## **Ethics Statement**

All members of the N3C community will be expected to abide by the highest ethical standards, such as those outlined in the [NIH standards for ethical research](https://oir.nih.gov/sourcebook/ethical-conduct/research-ethics). They are expected to follow all laws, regulations, and their organization’s policies related to the conduct of research, and adhere to the principles of Respect for Persons, Beneficence, and Justice as defined in the [Belmont Report.](https://www.hhs.gov/ohrp/regulations-and-policy/belmont-report/index.html) They must actively consider the effects their research could have on vulnerable populations, communities, and society and not use N3C resources for research that is discriminatory or stigmatizing of individuals or communities.

Plagiarism and data fabrication will not be tolerated either within the N3C Enclave or in downstream communications and publications. These and other ethics violations will be reported to the N3C leads and/or NCATS and may result in temporarily halting or revoking your or your institution’s access to N3C resources.

## **Diversity Statement**

We encourage the widest possible community to participate in N3C, and we are committed to building a community for all. We will not tolerate discrimination. Although this list cannot be exhaustive, we explicitly honor diversity in race, ethnicity, culture, age, sex, sexual orientation, gender identity or expression, physical size, language, national origin, immigration status, political beliefs, profession, religion, socioeconomic status, family status, educational level, and mental, technical, or physical ability.

**Conflict Resolution and Reporting Issues**

**Reporting issues.** If a community member experiences or witnesses violations of our Guiding Principles, unacceptable behavior, or if any other concern arises, then they can contact the Community Guiding Principles response team (Add team contact) or report it using the CGP-Report-Form (add link). This team of 2-3 individuals will be nominated by the community. Membership will be clearly delineated on the website. Finally, we remind all users that most universities have an ombuds office, which is a good place to start in determining the best path towards resolution if you are uncertain.

Of note, all reports will be handled with discretion and will receive serious attention.

**Conflict resolution strategy.** The N3C members have an established track record of numerous successful collaborations and expect to reach common agreement on management issues by thoroughly discussing and carefully considering the pros and cons of specific actions. It is thus expected that any differences of opinion will be resolved through good faith, constructive dialogue among all involved individuals. If those persons fail to resolve a dispute within seven (7) days, then the conflict shall be referred to a mediation committee consisting of first, one impartial senior executive from the institutions of each of the involved parties, and second, an additional impartial senior executive mutually agreed upon by the PIs. This mediation committee is formed such that none of its participants has direct involvement in N3C or the dispute in question. In some cases, the input may be sought from the NCATS during the formation of the mediation committee.
