# Supplementary material for: The National COVID Cohort Collaborative (N3C): Rationale, design, infrastructure, and deployment
Source: Oxford University Press journal article supplement (doi:10.1093/jamia/ocaa196), 2020-08-14
Supplement: ocaa196_supplementary_data.zip [file ocaa196_supplementary_data.zip › n3c-mastheadAuthors-2020-06-23.csv]

Order	First	Middle	Last	ORCID	Email	Institution	Department	City	State	Country	Contribution
1	Melissa		Haendel	https://orcid.org/0000-0001-9114-8737	melissa@tislab.org	Oregon Health & Science University	Department of Medical Informatics and Clinical Epidemiology	Portland	OR	USA	I have led the creation and implementation of N3C, coordinating all workstreams, resource development and integration, and generally playing data and people yenta.
2	Chris		Chute	https://orcid.org/0000-0001-5437-2545	chute@jhu.edu	Johns Hopkins University, Schools of Medicine, Public Health, and Nursing		Baltimore	MD	USA	Program initation, governance, guidance, technical strategy, and promotion.
3	Tell		Bennett	https://orcid.org/0000-0003-1483-4236	tell.bennett@cuanschutz.edu	Section of Informatics and Data Science, Department of Pediatrics, University of Colorado School of Medicine		Aurora	CO	USA	I contributed by participating in decision-making as co-lead of the Clinical Scenarios and Analytics subgroup and by offering language for and editing the manuscript.
4	David		Eichmann	https://orcid.org/00000-0003-3150-8758	david-eichmann@uiowa.edu	University of Iowa		Iowa City	IA	USA	I co-lead the Portal & Dashboards subgroup and am a member of the CD2H steering committee, and hence have been involved in decision making from the outset, as well as managing the N3C web site and COVID-19 publication search engine.
5	Justin	none	Guinney	https://orcid.org/0000-0003-1477-1888	justin.guinney@sagebase.org	Sage Bionetworks		Seattle	WA	USA	I have led the Collaborative Analytics workstream.
6	Warren		Kibbe	https://orcid.org/0000-0001-5622-7659	warren.kibbe@duke.edu	Duke University		Durham	NC	USA	Contributing to the policy and governance components and the N3C data enclave portal and dashboards.
7	Philip	R.O.	Payne	https://orcid.org/0000-0002-9532-2998	prpayne@wustl.edu	Washington University in St. Louis	Institute for Informatics (I²), Division of General Medical Sciences, School of Medicine, James McKelvey School of Engineering	Saint Louis	MO	USA	I have led the synthetic workstream.
8	Emily		Pfaff	https://orcid.org/0000-0002-6840-9756	epfaff@email.unc.edu	NC TraCS Institute, UNC Chapel Hill		Chapel Hill	MD	USA	I lead the Phenotype and Data Acquisition Workstream, and designed the data acquisition process in collaboration with a group of coders from across the CTSA consortium.
9	Peter	N	Robinson	https://orcid.org/0000-0002-0736-9199	peter.robinson@jax.org	Jackson Laboratory		Bar Harbor	ME	USA	I have led the Clinical Scenarios group and have contributed to the development of OMOP-HPO interoperability.
10	Joel		Saltz	https://orcid.org/0000-0002-3451-2165	joel.saltz@stonybrookmedicine.edu	Stony Brook University, Department of Biomedical Informatics		Stony Brook	NY	USA	Writing, contributed to decision making, contributed to system use case development and definition of covid 19 data elements
11	Heidi		Spratt	https://orcid.org/0000-0002-9420-5028	hespratt@utmb.edu	University of Texas Medical Branch		Galveston	TX	USA	N3C Clinical Scenarios & Data Analytics subgroup co-lead
12	Christine		Suver	https://orcid.org/0000-0002-2986-385X	christine.suver@sagebase.org	Sage Bionetworks		Seattle	WA	USA	governance WG lead - developed governance policies and documents
13	John	none	Wilbanks	https://orcid.org/0000-0002-4510-0385	john.wilbanks@sagebionetworks.org	Sage Bionetworks		Seattle	WA	USA	I have co-led the governance workstream.
14	Adam		Wilcox	https://orcid.org/0000-0002-6305-735X	abwilcox@uw.edu	University of Washington	Department of Biomedical Informatics and Medical Education	Seattle	WA	USA	Advisory role (overall goal and strategy); author role (writing review and editing); data role (data modeling, data transformation, data validation); conceptualization role (contributed the original data use principles, the data modeling approach for specific use cases, and the centralized data approach)
15	Andrew		Williams	https://orcid.org/0000-0002-0692-412X	awilliams15@tuftsmedicalcenter.org	Tufts Institute for Clinical Research and Health Policy Studies		Boston	MA	USA	My contribution fits the writing review and editing role in the contribution role ontology
16	Chunlei	none	Wu	https://orcid.org/0000-0002-2629-6124	cwu@scripps.edu	Scripps Translational Research Institute		La Jolla	CA	USA	I have co-led the Tools subgroup on collaborative analytics.
17	Clair		Blacketer	https://orcid.org/0000-0003-2570-2124	mblacke@its.jnj.com	Janssen Research and Development, LLC		Spring House	PA	USA	I have served the N3C consortium as an OMOP subject matter expert providing guidance around the transformation of PCORNet, I2B2, and TriNetX to the OMOP model as well as offering data quality insights and solutions to be employed in the data pipeline.
18	Robert		Bradford	https://orcid.org/0000-0003-0908-1428	rbrad@med.unc.edu	University of North Carolina at Chapel Hill		Chapel Hill	NC	USA	contributions to phenotype development from scientific and technical standpoint. Design and testing of phenotype and extraction scripts
19	James	J	Cimino	https://orcid.org/0000-0003-4101-1622	ciminoj@uab.edu	University of Alabama-Birmingham		Birmingham	AB	USA	Dr. Cimino served as a project advisor, and reviewed and provided comments on the manuscript.
20	Marshall		Clark		marshall_clark@med.unc.edu	University of North Carolina at Chapel Hill		Chapel Hill	NC	USA	Working on the phenotype and data acquisition stream, I developed the SQL code for the phenotype to run against PCORNet CDM, developed a python extraction script to help sites automate this process and contributed to the stream through daily meetings.
21	Evan		Colmenares	https://orcid.org/0000-0002-4993-2269	evan.colmenares@unchealth.unc.edu	University of North Carolina Department of Pharmaceutical Outcomes and Policy		Chapel Hill	NC	USA	I contributed to the design and code of the phenotype as well as the scripts to extract data from the common data models.
22	Tricia		Francis	https://orcid.org/0000-0001-9612-5702	pfranci4@jhu.edu	Johns Hopkins University		Baltimore	MD	USA	Project management, regulatory, team management, project administration
23	Davera		Gabriel	https://orcid.org/0000-0001-9041-4597	dgabrie4@jh.edu	Johns Hopkins University, School of Medicine		Baltimore	MD	USA	I provide content expertise and project management for the data ingestion and harmonization workstream
24	Alexis		Graves	https://orcid.org/0000-0002-2193-9987	alexis-graves@uiowa.edu	The University of Iowa		Iowa City	IA	USA	I’ve contributed code and design work for web and visualization development, helped to support communication with design work, and supported project administration on a local institutional level.
25	Raju		Hemadri		raju.hemadri@nih.gov	National Center for Advancing Translational Science		Bethesda	MD	USA	Design and architect DI&H system
26	Stephanie		Hong		stephanie.hong@jhu.edu	Johns Hopkins University, School of Medicine		Baltimore	MD	USA	I have designed and implemented the data ingestion and harmonization workflow both in SQL and as well as in Adeptia tool.
27	George	none	Hripscak		gh13@cumc.columbia.edu	Columbia University Irving Medical Center	Department of Biomedical Informatics	New York	NY	USA	I have helped with phenotyping and data harmonization related to OMOP.
28	Dazhi		Jiao	https://orcid.org/0000-0001-5052-3836	djiao@jhu.edu	Johns Hopkins University Institute for Clinical and Translational Research		Baltimore	MD	USA	Contributed code to the data harmonization process
29	Jeffrey		Klann		Jeff.Klann@mgh.harvard.edu	Harvard Medical School		Boston	MA	USA	Edited & provided comments on manuscript; participate in governance and data harmonization discussions; offer expertise on i2b2/ACT data model
30	Kristin		Kostka		kristin.kostka@iqvia.com	IQVIA		Durham	NC	USA	OMOP SME / Coder for Phenotype & Data Acquisition + Data Harmonization & Ingestion WGs
31	Adam		Lee		aml14@email.unc.edu	University of North Carolina at Chapel Hill		Chapel Hill	NC	USA	Contribution to phenotype and data intake development, processing, and PCORNet SME.
32	Harold		Lehmann	https://orcid.org/0000-0002-7698-219X	lehmann@jhmi.edu	Johns Hopkins University		Baltimore	MD	USA	I participate in daily DI&H meetings, have site data collection and curation responsibility for JHU, and have reviewed the MS.
33	Lora		Lingrey		Lora.Lingrey@trinetx.com	TriNetX, Inc.		Cambridge	MA	USA	Developed TriNetX phenotype and extract logic.
34	Robert		Miller	https://orcid.org/0000-0002-1787-2855	rmiller1@tuftsmedicalcenter.org	Tufts Clinical and Translational Science Institute		Boston	MA	USA	Contributed code and data
35	Michele		Morris		mim18@pitt.edu	University of Pittsburgh		Pittsburgh	PA	USA	Phenotype small work group code and ACT to OMOP harmonization SME
36	Shawn	N	Murphy		snmurphy@partners.org	Partners healthcare		Charlestown	MA	USA	I have helped with phenotyping and data harmonization related to ACT.
37	Karthik		Natarajan	https://orcid.org/0000-0002-9066-9431	kn2174@cumc.columbia.edu	Columbia University Irving Medical Center		New York	NY	USA	I have helped with phenotyping, analytics and code. I've also provided general input on OMOP.
38	Matvey		Palchuk	https://orcid.org/0000-0002-7737-8752	Matvey.Palchuk@trinetx.com	TriNetX, Inc.		Cambridge	MA	USA	representative of TriNetX - responsible for N3C submissions; active member of Phenotype and Data Acquisition working group
39	Usman	none	Sheikh		mohammad.sheikh@nih.gov	National Center for Advancing Translational Science		Bethesda	MD	USA	My contribution has been to manage the NCATS infrastructure implementation and coordinate all of the vendors.
40	Harold		Solbrig	https://orcid.org/0000-0002-5928-3071	solbrig@jhu.edu	Johns Hopkins Institute for Clinical & Translational Research		Baltimore	MD	USA	Advisory and data transformation
41	Shyam		Visweswaran	https://orcid.org/0000-0002-2079-8684	shv3@pitt.edu	Department of Biomedical Informatics, University of Pittsburgh		Pittsburgh	PA	USA	Participating in decision-making in the Phenotype and Data Acquisition workstream.
42	Anita	none	Walden	https://orcid.org/0000-0002-3327-7423	waldenan@OHSU.edu	Oregon Health & Science University, Sage Bionetworks	Oregon Clinical & Translational Research Institute	Portland	OR	USA	I have read contributed and edit the manuscript. My role in N3C as Assistant Director is operationalizing the infrastructure for the N3C, project management planning around the governance activities, organizing groups and helping to design and implement user-centered design principles for website and portals.
43	Kellie		Walters		kellie_walters@med.unc.edu	North Carolina Translational and Clinical Sciences Institute (NC TraCS), University of North Carolina at Chapel Hill		Chapel Hill	MD	USA	Active member of Governance and Phenotype workstreams; revised manuscript text for those sections; reviewed and revised governance documentations; contributed to governance planning discussions; drafted data acquisition documentation; project management for data acquisition team.
44	Griffin		Weber	https://orcid.org/0000-0002-2597-881X	weber@hms.harvard.edu	Department of Biomedical Informatics, Harvard Medical School		Boston	MA	USA	Participated in decision-making in the data quality group and patient hashing meetings.
45	Xiaohan	Tanner	Zhang	https://orcid.org/0000-0002-4843-9077	xzhan161@jhmi.edu	Johns Hopkins University, School of Medicine		Baltimore	MD	USA	I am an active member responsible for design and implementation in data ingestion and harmonization workstream.
46	Richard		Zhu	https://orcid.org/0000-0002-4289-7632	zhu@jhu.edu	The Johns Hopkins Institute for Clinical and Translational Research		Baltimore	MD	USA	Data Ingestion & Harmonization Workstream
47	Andrew		Girvin	https://orcid.org/0000-0002-2031-9209	agirvin@palantir.com	Palantir Technologies		Palo Alto	CA	USA	I worked on the design and implementation of the Palantir platform for the N3C consortium, along with the first set of analyses done within it.
48	Nabeel		Qureshi		nqureshi@palantir.com	Palantir Technologies		Palo Alto	CA	USA	I led the design and implementation of the Palantir Analytic platform for the N3C consortium, along with the first set of analyses done within it.
49	Lili	M	Portilla		portilll@mail.nih.gov	National Center for Advancing Translational Science	Office of Strategic Alliances	Bethesda	MD	USA	I have led the regulatory coordination with institutions and supported development with the governance workstream.
50	Sam		Michael		michaelsg@mail.nih.gov	National Center for Advancing Translational Science		Bethesda	MD	USA	As the CIO of NCATS i help support the entire N3C initiative from a design, implementation, operation and standpoint.
51	Michael	G	Kurilla		michael.kurilla@nih.gov	National Center for Advancing Translational Science	Division of Clinical Innovation	Bethesda	MD	USA	I have led the coordination of NIH programs
52	Joni	L	Rutter	https://orcid.org/0000-0002-6502-2361	joni.rutter@nih.gov	National Center for Advancing Translational Science	Office of the Director	Bethesda	MD	USA	I have led the regulatory implementation at NIH and provided programmatic vision and oversight.
53	Chris	P	Austin	https://orcid.org/0000-0001-7770-0708	austinc@mail.nih.gov	National Center for Advancing Translational Science		Bethesda	MD	USA	Participated in decision making, scoping, and design of the project
54			National COVID Cohort Collaborative			(Consortial Author)
55	Ken	R	Gersing	https://orcid.org/0000-0003-3897-3409	Kenneth.Gersing@nih.gov	National Center for Advancing Translational Science		Bethesda	MD	USA	I have led the implementation of the architecture at NCATS as well as co-led the entire N3C effort across all workstreams.
